## Dopamine Promotes Cognitive Effort by Biasing the Benefits versus Costs of Cognitive Work

**Authors:** A. Westbrook<sup>1,2,3\*</sup>, R. van den Bosch<sup>1,2</sup>, J. I. Määttä<sup>1,2</sup>, L. Hofmans<sup>1,2</sup>, D. Papadopetraki<sup>1,2</sup>, R. Cools<sup>1,2\*†</sup>, M. J. Frank<sup>3\*†</sup>

### 5 Affiliations:

<sup>1</sup>Donders Centre for Cognitive Neuroimaging, Nijmegen, The Netherlands

<sup>2</sup>Department of Psychiatry, Radboud University Medical Center, Nijmegen, The Netherlands

<sup>3</sup>Department of Cognitive Linguistics and Psychological Sciences, Brown University, Providence, The United States of America

10 \*Corresponding Author: [andrew.westbrook@brown.edu](mailto:andrew.westbrook@brown.edu)

\*Senior Authors: [roshan.cools@donders.ru.nl](mailto:roshan.cools@donders.ru.nl), [Michael\\_Frank@brown.edu](mailto:Michael_Frank@brown.edu)

†Senior Authors contributed equally and are listed in alphabetical order.

**Abstract:** Stimulants like methylphenidate are increasingly used for cognitive enhancement, but precise mechanisms are unknown. Here we show that methylphenidate boosts willingness to  
15 expend cognitive effort by altering the benefit-to-cost ratio of cognitive work. Willingness to expend effort was greater for participants with higher striatal dopamine synthesis capacity, while methylphenidate and sulpiride – a selective D2 receptor agent – increased cognitive motivation more for participants with lower synthesis capacity. A sequential sampling model informed by momentary gaze revealed that decisions to expend effort are related to amplification of benefit-  
20 versus-cost information attended early in the decision process, while the effect of benefits is strengthened with higher synthesis capacity and by methylphenidate. These findings demonstrate that methylphenidate boosts the perceived benefits-versus-costs of cognitive effort by modulating striatal dopamine signaling.

### Main Text:

25 Cognitive control is subjectively effortful, causing people to avoid demanding tasks (1) and to discount goals (2, 3), but incentives can offset these costs (2). Striatal dopamine invigorates physical action by mediating the tradeoff between physical costs and benefits (4). In cortico-striatal loops governing action selection, dopamine has opponent effects on D1 and D2-expressing medium spiny neurons, which are thought to modulate the relative sensitivity to the  
30 benefits versus the costs of actions (5). Given that similar mechanisms are thought to govern cognitive action selection (6-8), we hypothesized that striatal dopamine could promote willingness to exert cognitive effort, boosting motivated cognitive control for attention, planning, and decision-making (9-12).

35 Converging evidence from research on Parkinson's disease (13-17), showing dopamine-dependent changes in cognitive motivation, provides an initial basis for this conjecture. Moreover, catecholamine-enhancing psychostimulants alter cognitive effort-based choice in both rodents (10) and humans (18). This raises the question of whether commonly used "smart drugs" act by enhancing the willingness rather than ability to exert cognitive control. Indeed, the dominant interpretation of stimulant effects is that they improve cognitive processing, via direct  
40 effects on cortical areas, noradrenaline transmission (19, 20) and/or concomitant improvements

in working memory capacity (21). We hypothesized that instead, methylphenidate boosts cognitive control by increasing striatal dopamine and thereby the benefit-to-cost ratio of cognitive effort.

45 Here, we measured striatal dopamine synthesis capacity using [<sup>18</sup>F]DOPA PET in young, healthy participants. In a randomized, repeated-measures design, we also administered placebo, methylphenidate (a dopamine and noradrenaline reuptake blocker), and sulpiride (a selective D2 receptor agent) while participants made explicit cost-benefit decisions about whether to engage in cognitive effort. We further monitored participants' gaze to cost and benefit attributes and assessed how fixations interacted with attribute values and dopamine to impact dynamic decision  
50 processes (8, 22-24).

### Results:

50 healthy, young adult participants (ages 18—43, 25 men) from The Netherlands were tasked with completing a cognitive effort discounting paradigm (2) in which they experienced multiple levels of the N-back working memory task, and then made cost-benefit decisions about  
55 whether to repeat more or less effortful levels for different amounts of money. Offers to repeat tasks were titrated until participants were indifferent between offers of more money for a harder task (N = 2, 3, or 4) and less money for an easier task (N = 1 or 2). The amount of money required to make a participant indifferent between higher versus lower load levels quantified relative subjective effort costs. Conversely, we defined the subjective value of an offer to repeat  
60 a higher load task (N = 2—4) to be the amount offered for the easiest load (N = 1) at indifference.

Participants discounted more with increasing N-back load, indicating higher subjective costs (Fig. 1A). Participants also discounted less when offered a larger amount for the hard task (€4 versus €2). Critically, higher dopamine synthesis capacity in the caudate nucleus – as defined  
65 by an independent, functional connectivity-based parcellation of the striatum (25) – predicted greater willingness to expend cognitive effort (higher subjective values; Fig. 1A—C, cf. Fig. S1). A hierarchical regression analysis confirmed that subjective values increased with larger offer amounts ( $\beta = 0.022$ ,  $P = 0.011$ ), smaller relative load ( $\beta = -0.15$ ,  $P = 8.9 \times 10^{-15}$ ), and higher dopamine synthesis capacity ( $\beta = 0.064$ ,  $P = 0.022$ ) on placebo. No other region outside the  
70 caudate nucleus showed reliable individual difference effects (Supplemental Results; Fig. S1—S2).

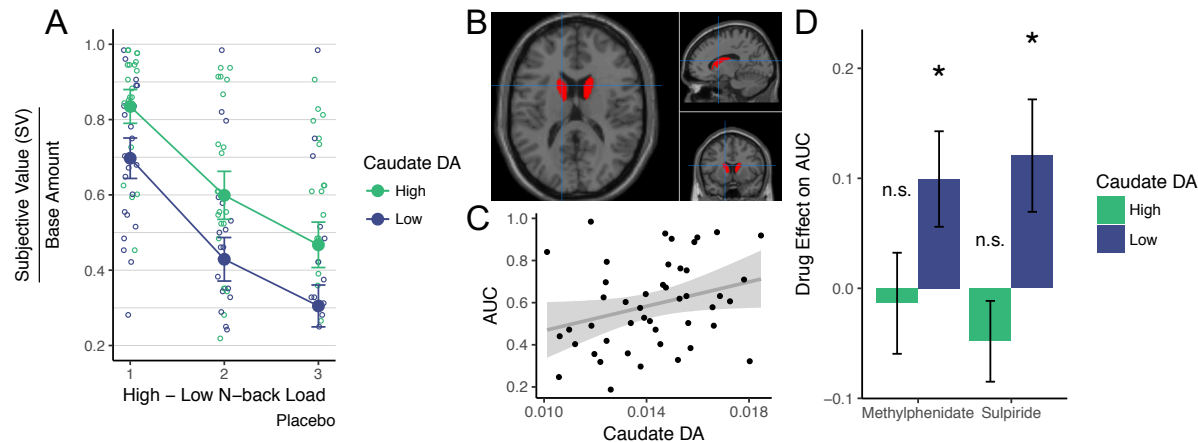

**Fig. 1.** Participants discounted offers as a function of cognitive load, caudate dopamine synthesis capacity (DA), and drug status. **A.** High-load offer value was discounted more as the high-load level increases relative to the low-load level, and more overall for participants with low- versus high-dopamine synthesis capacity in the caudate nucleus. Empty circles show individual participants' indifference points. **B.** Caudate nucleus mask. Crosshairs at MNI coordinates [-14, 10, 16]. **C.** Average discounting, summarized by area under the curve (AUC) correlated positively with caudate dopamine synthesis capacity on placebo (Spearman  $r = 0.32$ ,  $P = 0.029$ ). **D.** Subjective offer values increased for participants with low dopamine synthesis capacity on methylphenidate ( $t_{\text{paired}}(22) = 2.29$ ,  $P = 0.032$ ), and sulpiride ( $t_{\text{paired}}(22) = 2.36$ ,  $P = 0.028$ ), but not for those with high dopamine synthesis capacity ( $P \geq 0.21$  for both).

If dopamine mediates the impact of cost/benefit computations on cognitive effort, then it should be possible to increase motivation in low dopamine individuals by pharmacological means. Indeed, both methylphenidate and sulpiride increased subjective values and cognitive motivation specifically for participants with low, but not high dopamine synthesis capacity (Fig. 1D; Fig. S2B—C). Hierarchical regression analyses of subjective values across sessions, controlling for load, offer amount, and session order, revealed a main effect of caudate synthesis capacity ( $\beta = 0.070$ ,  $P = 0.0072$ ) and interactions between synthesis capacity with both methylphenidate ( $\beta = -0.069$ ,  $P = 0.0042$ ) and sulpiride versus placebo ( $\beta = -0.10$ ,  $P = 8.3 \times 10^{-4}$ ). Neither drug showed a main effect across participants ( $P \geq 0.37$  for both).

The converging effects of baseline dopamine measures and two separate agents strongly implicate striatal dopamine. By blocking dopamine transporters, methylphenidate increases extracellular striatal dopamine tone (26) and can further amplify transient dopamine release (27). Sulpiride is a D2 receptor antagonist which, at low doses increases striatal dopamine release by binding pre-synaptic auto-receptors in both rodents and humans (6, 17, 28-31). In humans, sulpiride can enhance reward prediction error signaling and reward learning (31). While at higher doses the drug can act as a dopamine blocker (32), reaction time analyses buttress the hypothesis that both methylphenidate and sulpiride increased dopamine release. Response speed (inverse reaction time) was faster on methylphenidate and sulpiride compared with placebo ( $t_{\text{methylphenidate},45} = 3.25$ ,  $P = 0.0022$ ;  $t_{\text{sulpiride},45} = 2.73$ ,  $P = 0.0089$ ), consistent with dopamine-mediated behavioral invigoration (33).

To assess whether dopamine increased motivation by amplifying subjective benefits versus costs, we made a series of offers, in a second phase of the experiment, centered around

105 participants' individual indifference points, while also monitoring gaze at cost or benefit  
 information (Fig. 2A). To generate specific predictions, we simulated psychometric choice  
 functions with a computational model of striatal dopamine effects on value-based decision  
 making (5). As simulated dopamine rises, the model predicts enhanced sensitivity to benefit  
 110 differences and reduced sensitivity to cost differences. This effect is manifest as a steeper choice  
 function to the right of the indifference point, where the ratio of benefits to costs (of the high-  
 versus low-effort option) is larger (Fig. 2B). Conversely, simulated increases in striatal dopamine  
 revealed slower saturation of the logistic function towards the left of indifference, where the  
 benefits-to-costs ratio is smaller.

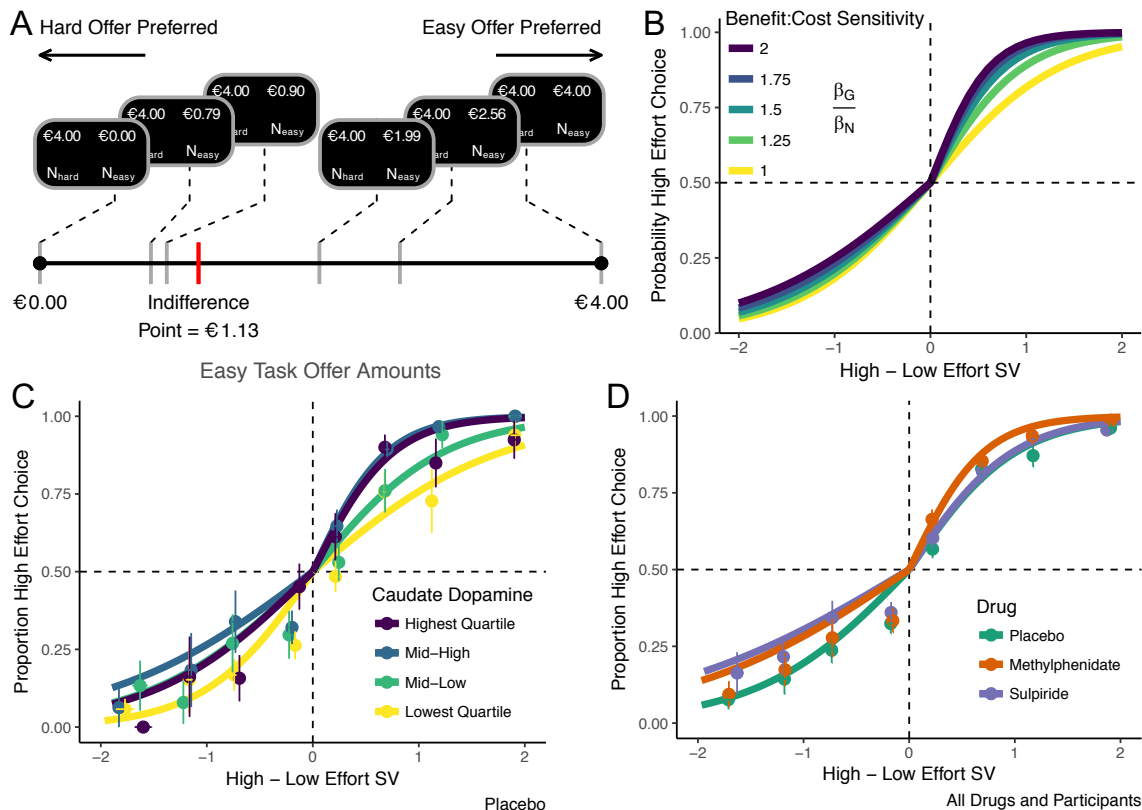

115 **Fig 2.** High- versus low-effort choices are influenced by dopamine effects on sensitivity to  
 benefits versus costs. **A.** Example low-effort ( $N_{easy}$ ) offers paired with a €4 offer for a high-effort  
 N-back task ( $N_{hard}$ ; subjective value of €1.13). Offers were tailored to individual participants'  
 indifference points based on the discounting phase. **B.** Simulated effects of increasing dopamine  
 120 on sensitivity to benefits versus costs, based on (5), predicts steeper logistic function to the right  
 of the indifference point, where the ratio of benefits to costs of the high-effort offer is larger,  
 and shallower function to the left where the ratio is smaller. **C.** Higher caudate dopamine synthesis  
 capacity and **D.** methylphenidate and sulpiride versus placebo all qualitatively mimicked the  
 simulated effects of increased dopamine release. Logistic regression curves fit across all drugs  
 for each synthesis capacity quartile (**C.**) or all participants for each drug (**D.**). Points indicate  
 125 means and SEM of subject means at value-difference quantiles.

Participant choices supported model predictions. Simulated effects were mirrored by both  
 individual variation in caudate dopamine synthesis capacity (Fig. 2C) under placebo, as well as  
 by the effect of methylphenidate and sulpiride versus placebo (Fig. 2D). Formally, a hierarchical

130 logistic regression analysis revealed that high effort selection was sensitive to both benefits (the  
 difference in offer amounts;  $\beta = 2.30$ ,  $P = 1.2 \times 10^{-9}$ ) and costs (the difference in load;  $\beta = -1.07$ ,  
 $P < 2.2 \times 10^{-16}$ ). Critically, the effect of benefits was increased with higher synthesis capacity ( $\beta$   
 $= 0.65$ ,  $P = 0.0024$ ) and on methylphenidate ( $\beta = 1.34$ ,  $P = 0.0048$ ), while the effect of costs was  
 135 attenuated on sulpiride ( $\beta = 0.24$ ,  $P = 0.036$ ). Complementing the effects observed in the  
 discounting task, participants also selected high-effort choices more often with higher caudate  
 synthesis capacity ( $\beta = 1.02$ ,  $P = 3.1 \times 10^{-4}$ ), and on methylphenidate ( $\beta = 1.75$ ,  $P = 0.0016$ )  
 versus placebo, but not reliably so for sulpiride ( $\beta = 0.46$ ,  $P = 0.12$ ). No other interaction terms  
 or main effects were significant ( $P \geq 0.47$  for all). These results support that striatal dopamine  
 promotes selection of high-cost, high-benefit alternatives, and moreover that dopamine synthesis  
 capacity and methylphenidate particularly amplify the effect of benefits on choice, while  
 140 sulpiride particularly attenuates the effect of costs.

The above findings demonstrate clear impacts of dopamine on choice but they do not  
 uncover how the decision process is altered. Dopamine could increase motivation by causing  
 participants to attend more to benefits versus costs. Alternatively, it could alter the impact of,  
 and/or attention to these attributes on choice. To disentangle these hypotheses, we tracked eye  
 145 gaze to quantify attention to attributes and assess how this interacted with dopamine. Proportion  
 gaze at an offer strongly predicted offer selection (Fig. 3B—C), as previously shown in  
 economic choice tasks (23, 24, 34). Moreover, gaze at hard task benefits predicted high-effort  
 selection more strongly than gaze at costs (Fig. 3B). These patterns suggest that relative attention  
 to benefits versus costs indeed plays a role in determining trial-by-trial choice of the high-effort  
 150 offer.

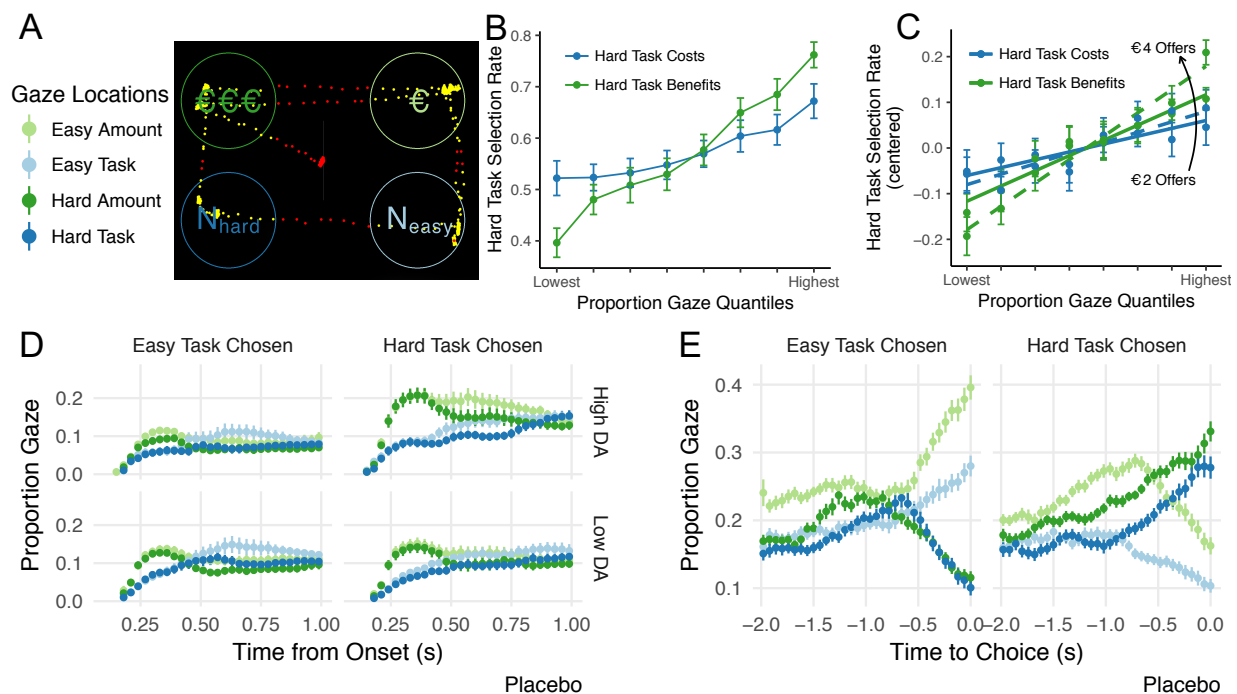

**Fig. 3** Effect of gaze, offer value, and dopamine synthesis capacity on cognitive effort selection.  
**A.** On each trial, participants decided between left and right options with costs (N-back load) and  
 155 benefits (Euros) displayed separately in space. Dots indicate gaze at (yellow) and away from  
 (red) cost or benefit information. **B.** Increasing gaze at the high-effort option predicted high-

effort selection ( $\beta = 0.30$ ,  $P = 7.6 \times 10^{-6}$ ), with stronger impacts of gaze at benefits vs costs (gaze by dimension interaction  $\beta = 0.41$ ,  $P = 1.1 \times 10^{-5}$ ). **C.** Effects of gaze on choice were stronger with increasing offer values (solid lines: €2 offers, dashed lines: €4 offers). **D—E.** Average (cross-trial) gaze at each of the four information quadrants following offer onset and leading up to response. **D.** Early gaze (250—450ms following offer onset) was predominantly directed at benefit information, particularly on trials in which the high-effort task was selected. This effect was larger with higher dopamine synthesis capacity (DA). **E.** Later in the trial, leading up to the response, gaze was increasingly allocated to either dimension of the to-be-selected offer.

Gaze dynamics further revealed that dopamine enhanced the impact of attention to benefits-versus-costs on cognitive effort selection. When participants selected the high-effort option, they were more likely to have fixated on benefit versus cost information early in a trial (250—450 ms after offer onset; Fig. 3D; main effect of choice:  $\beta = 0.41$ ,  $P = 0.0017$ ). This impact of early focusing on benefits on high-effort task selection was greater in participants with higher caudate dopamine synthesis capacity under placebo (choice by synthesis capacity interaction:  $\beta = 0.37$ ,  $P = 0.0045$ ). In addition, methylphenidate increased this gaze bias on choice for subjects with low synthesis capacity (interaction between drug, synthesis capacity, and gaze:  $\beta = -0.041$ ,  $P = 0.012$ ). Importantly, drugs and synthesis capacity did not impact gaze patterns themselves irrespective of costs and benefits ( $P \geq 0.10$  for main effects of synthesis capacity and drug), indicating that dopamine did not increase attention to benefits-versus-costs, but rather amplified its effect on choice.

We also found that the gaze bias on choice was stronger when offer values were higher (Fig. 3C). Indeed, a hierarchical logistic regression revealed that high-effort selection was predicted by greater proportion gaze at the high-effort offer ( $\beta = 0.81$ ,  $P < 2.1 \times 10^{-16}$ ), and this effect was stronger with larger summed offer values (interaction:  $\beta = 0.18$ ,  $P = 1.7 \times 10^{-6}$ ). Gaze-by-value interactions are predicted by a prominent model causally implicating attention in evidence accumulation. By this account, gaze increases the perceived value of attended versus unattended offers (23, 35) – an effect which should grow as the value of both offers grows. An alternative account reverses this causality and posits that putative influences of gaze on choice might instead reflect a window into the decision-maker's latent choice prior to responding (24). Participants might, for example, identify their preference and then fixate on that preference before responding. Indeed, ~775 ms prior to their choice response, participants showed a clear pattern of gaze bifurcation, committing their gaze away from the unchosen, and towards the to-be-chosen offer (Fig. 3E). Thus, while early gaze appears to influence preferences, later gaze appears to reflect the outcome of the decision.

To disentangle how dopamine, gaze and value drive cost-benefit evidence accumulation, we fit hierarchical drift diffusion models (36) in which cost and benefit information are accumulated into a decision variable that rises to a bound. We considered models in which gaze amplifies the effect of value on evidence accumulation (23), estimated as an multiplicative effect, and those in which gaze merely reflects choice, estimated as a simple, additive effect on evidence accumulation (24). The best fitting model (Fig. 4A—C) included both additive and multiplicative interactions of gaze. Formally, on a given trial ( $i$ ), the drift rate ( $v$ ) at which participants accumulate evidence in favor of offer  $A$  is given by gaze at benefits ( $g_{Ben}$ ) and its interaction with the benefits of  $A$  versus  $B$  ( $\Delta V_{Ben}$ ), gaze at costs ( $g_{Cost}$ ) and its interaction with costs ( $\Delta V_{Cost}$ ), as well as additive contributions of gaze at offer  $A$  for both benefits ( $g_{BenA} - g_{BenB}$ ), and costs ( $g_{CostA} - g_{CostB}$ )

$$v_i \sim \beta_0 + \beta_1(g_{BenA} - g_{BenB}) + \beta_2(g_{CostA} - g_{CostB}) + \beta_3 g_{Ben} \Delta V_{Ben} + \beta_4 g_{Cost} \Delta V_{Cost} + \beta_5 g_{Cost} \Delta V_{Ben} + \beta_6 g_{Ben} \Delta V_{Cost} \quad \text{Eqn. 1}$$

According to the fitted model, benefits had a larger effect when participants spent time fixating benefits versus costs ( $\beta_3 - \beta_5 = 0.42$ ,  $P = 2.0 \times 10^{-4}$ ), indicating that gaze and value combine multiplicatively, but there were also strong additive effects of gaze at both the benefits and costs of *A* versus *B* ( $\beta_1 = 0.13$ ,  $P < 2.2 \times 10^{-16}$ ;  $\beta_2 = 0.15$ ,  $P < 2.2 \times 10^{-16}$ ).

Dopamine also amplified the impact of benefits on evidence accumulation. Specifically, the benefits effect on drift rate was larger in participants with higher caudate dopamine synthesis (Fig. 4D), and methylphenidate also increased the effect of benefits across participants (Fig. 4E).

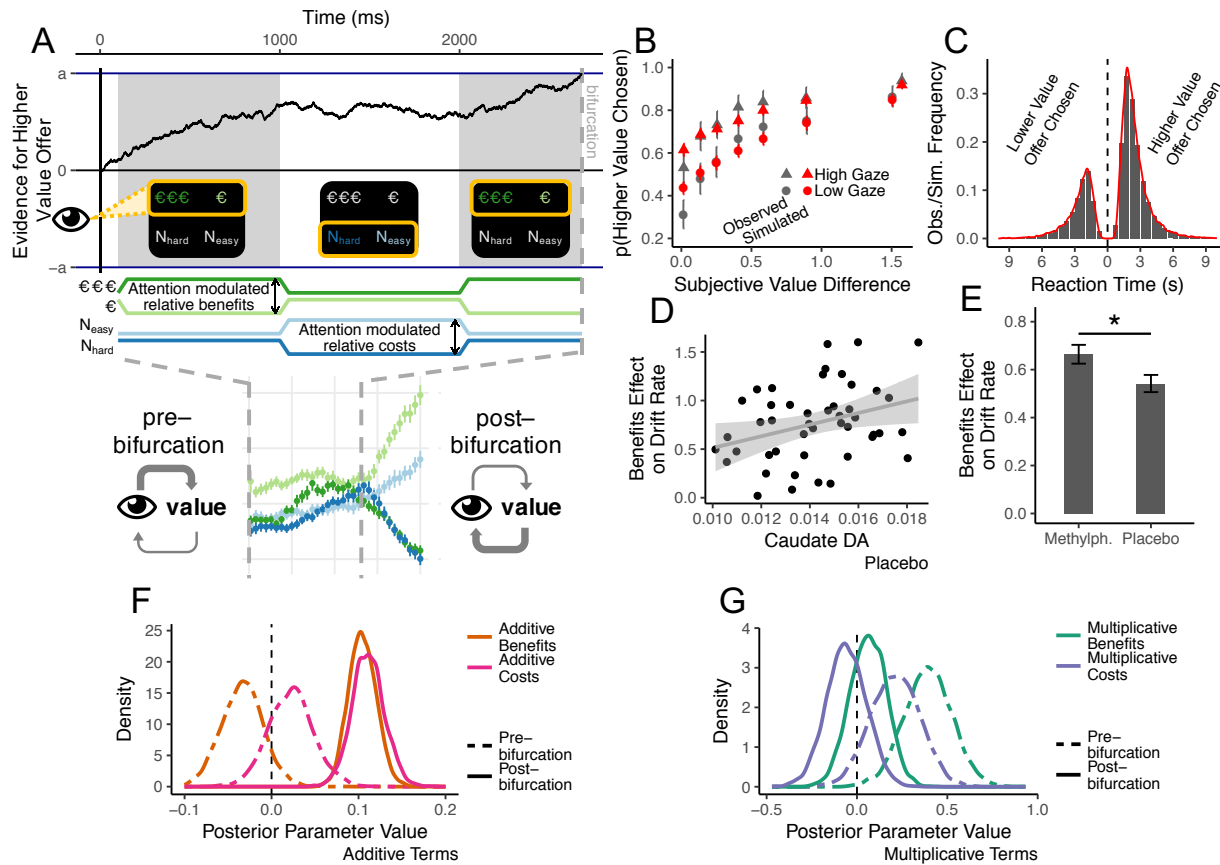

**Fig. 4.A.** Model dynamics of gaze-attribute interactions during choice: pre-(latent) decision gaze amplified the effect of attended versus unattended attributes driving evidence accumulation. Post-decision gaze increasingly reflected the to-be-selected response. **B.** Simulations (in red) reveal that the fitted model accurately predicts the observed mean rate of higher-valued offer selection (in grey). Model captures both the effect of (seven quantiles of) offer value differences and above-versus below-median gaze at the higher-valued offer across all sessions. Error bars give observed and simulated between-subject SEM. **C.** Our model also closely predicts observed reaction time distributions. **D.** The effect of benefits on the drift rate was larger for those with higher caudate dopamine synthesis capacity on placebo ( $\beta_3 + \beta_5/2$  from Eqn. 1; Pearson  $r = 0.30$ ,  $P = 0.039$ ; grey region indicates 95% CI), and **E.** on methylphenidate versus placebo ( $t_{\text{paired}}(45) = 2.54$ ,  $P = 0.015$ ; error bars give between-subject SEM). **F—G.** Posterior parameter densities from hierarchical drift diffusion models fit alternately with pre- (dashed lines) or post-bifurcation (solid)

gaze dwell times on placebo. **F.** Additive benefit ( $\beta_1 = -0.030$ ;  $P = 0.076$ ) and cost ( $\beta_2 = 0.020$ ;  $P = 0.81$ ) gaze terms were approximately zero pre-bifurcation, and reliably positive post-bifurcation ( $\beta_1 = 0.10$ ;  $P < 2.2 \times 10^{-16}$  and  $\beta_2 = 0.11$ ;  $P = 0.0031$ ). **G.** Multiplicative interaction terms reveal that the effects of benefits ( $\beta_3 - \beta_5 = 0.40$ ;  $P = 0.0024$ ) and costs (at trend-level;  $\beta_4 - \beta_6 = 0.12$ ;  $P = 0.060$ ) were larger when fixating the respective attribute pre-bifurcation, while neither term was different from zero, post-bifurcation ( $\beta_3 - \beta_5 = 0.07$ ;  $P = 0.27$  and  $\beta_4 - \beta_6 = -0.06$ ;  $P = 0.70$ ).

Given evidence that gaze amplified the effect of benefits-versus-costs early in the trial (Fig. 3D) but reflected the upcoming decision late in the trial (Fig. 3E), we considered the possibility that the gaze-value interactions change dynamically across the trial. Specifically, we hypothesized that early gaze multiplicatively interacts with value, amplifying the effect of attended-versus-unattended attributes, while late gaze combines additively (Fig. 4A). To test this hypothesis, we split trials according to when participants began committing their gaze to the to-be-chosen offer (the “bifurcation”) for each participant and session. We then refit our model to gaze data from before or after this time point. The result clearly supported our hypothesis. Namely, we found that multiplicative terms were reliably positive pre-bifurcation but near zero post-bifurcation, with the opposite pattern for additive terms (Fig. 4F—G). These results support the hypothesis that attention amplifies the effect of cost-benefit attributes early in a decision, while late gaze simply reflects a latent choice. Critically, methylphenidate amplified the effects of benefits on drift rate even when only modeling pre-bifurcation gaze ( $(\beta_3 + \beta_5/2)_{MPH} - (\beta_3 + \beta_5/2)_{PBO} = 0.26$ ;  $P = 0.019$ ), indicating that it amplified the effect of benefits on choice when attention sharpened the influence of attended-versus-unattended information. Collectively, our results support that attention to benefits and methylphenidate enhances motivation for cognitive effort by amplifying the effects of benefits versus costs on choice.

## Materials and Methods:

### Methods

*Participants* 50 Healthy, young adult participants (ages 18—43, 25 men) were recruited from The Netherlands to participate in a larger, within-subject, double-blind, placebo-controlled, pharmaco-imaging study. Participants were screened to ensure that they are right handed, Dutch-native speakers, healthy, and neurologically normal with no (relevant) history of mental illness or substance abuse. Participants were also excluded for history of hepatic, cardiac or respiratory disorders, epilepsy, hypersensitivities to methylphenidate, entacapone, carbidopa, or sulpiride, suicidality, smoking, diabetes, or claustrophobia. Participants also had normal-to-corrected hearing and vision. Pregnant or breast-feeding participants were excluded. The study was approved by the regional research ethics committee (Commissie Mensgebonden Onderzoek, region Arnhem-Nijmegen; 2016/2646; ABR: NL57538.091.16).

All complete datasets were included for analyses, as well as partial datasets, where available. PET data were not collected for two participants who were thus excluded from individual difference analyses testing the effects of dopamine synthesis capacity. These same two participants also failed to participate in all the drug sessions and were excluded from analyses of relevant drug effects. One did not participate in the placebo or methylphenidate session, while the other did not participate in the methylphenidate session. In addition, a third participant did not participate in the sulpiride session. While remaining participants completed all sessions, two more participants showed no sensitivity to cognitive demands in the discounting task, never once selecting the low-effort, low-reward option in any drug session. Given



uncertainty about whether these participants followed task instructions to consider both choice dimensions, these two participants were excluded from all analyses.

270 *General Procedure and Tasks* The broader study (n = 100 participants) was designed to investigate the effects of dopaminergic drugs on cognitive control, and how those drug effects depend on baseline dopamine synthesis capacity. Participant engagement spanned five visits: a 3-hour screening session, three, 6-hour pharmaco-imaging sessions with multiple tasks both in, and out of an fMRI scanner after being administered placebo, sulpiride, or methylphenidate, and a final 2.5-hour PET session for measuring dopamine synthesis capacity. Errors in drug  
275 scheduling meant that drug session order was not perfectly counterbalanced. Consequently, 23, 15, and 10 participants took placebo on session number 1, 2, and 3, respectively, while the numbers were 12, 18, and 18 for sulpiride, and 13, 15, and 20 for methylphenidate. Given data loss and imperfect counterbalancing of drug by session order, we confirmed all inferences via hierarchical regression analyses controlling for session order as a factor.

280 During screening, after providing written consent, participants completed medical and psychiatric screening interviews, reviewing height, weight, pulse rate, blood pressure, and electrocardiography, neuropsychological status, and existence of (relevant) DSM-IV axis-I disorders, and ADHD. Next, participants completed a structural T1-weighted magnetization prepared, rapid-acquisition gradient echo sequence MRI scan (TR 2300 ms, TE 3.03 ms, flip  
285 angle 8°, 192 sagittal slices, 1 mm thick, field of view 256 mm, voxel size 1x1x1 mm), scanned by a Siemens MAGNETOM Skyra 3 Tesla MR scanner. Finally, participants completed digit span and a listening span working memory tests, a WAIS IV fluid intelligence test, and we also measured their resting eye-blink rate via electrooculography.

290 Participants were asked to refrain from smoking or drinking stimulant-containing beverages the day before a pharmaco-imaging session, and from using psychotropic medication and recreational drugs 72 hours before each session, and were also required to abstain from cannabis throughout the course of the experiment. During a pharmaco-imaging session, participants completed multiple tasks, including the tasks which are the focus of this study: the N-back task, a cognitive effort discounting task adapted from (2), and a gaze-decision making  
295 task. At the beginning of a session, participants completed another screening form and a pregnancy test. In addition, we measured baseline subjective measures, mood and affect, as well as temperature, heart rate, and blood pressure at baseline (these measures were also recorded at two fixed time points after drug administration). We further monitored baseline mood and affect before and after drug administration. Other tasks which participants completed, but which were  
300 not analyzed here, included a reinforcement learning task designed to dissociate contributions of reinforcement learning and working memory during stimulus-response learning, three tasks measuring creativity, and a Pavlovian-to-instrumental transfer task. Participants also completed two tasks in the fMRI scanner: one measuring striatal responsivity to reward cues and a reversal learning task. Finally, we also collected measures of depression, state affect, BIS/BAS,  
305 impulsivity, and the degree to which participants pursue cognitively demanding activities in their daily life. A preregistration for the broader study, as well as a complete list of measures collected, and their intended use is detailed in a pre-registration:  
<https://www.trialregister.nl/trial/5959>.

310 Note that the first 50 participants recruited for the broader (n = 100) study also completed a different, yet complementary decision-making task in which participants decided whether to engage with a demanding, but rewarded working memory task, or instead have free time

(Hofmans, Papadopetraki, van den Bosch, Määttä, Froböse, Zandbelt, Westbrook, Verkes, & Cools, *submitted*).

315 All tasks analyzed in this paper were presented using Psychtoolbox-3 for MATLAB. Prior  
to drug administration, participants completed all levels of the N-back task to re-familiarize  
themselves with the subjective demands of each level. The N-back task was performed off-drug  
so that drugs would alter neither performance nor subjective experience of the N-back. Next  
participants were administered drugs prior to the effort discounting and gaze-decision making  
tasks. To accomplish double-dummy blinding as to drug condition, participants took one capsule  
320 at each of two different time points: time point one was either placebo or 400 mg sulpiride, while  
time point two was either placebo or 20 mg methylphenidate. 50 minutes after taking  
methylphenidate (or placebo on sulpiride and placebo days), 140 minutes after sulpiride (or  
placebo on methylphenidate and placebo days), or 50 after taking the second placebo (on placebo  
days), participants performed the effort discounting and gaze-decision tasks. These times were  
325 chosen to maximize the impact of drugs which near their pharmacokinetic and physiological  
effect peaks in the range of 60—90 and 60-180 minutes for methylphenidate (37) and sulpiride  
(38), respectively.

*N-back Task* For the N-back task, off-drug, participants completed levels  $N = 1-4$ ,  
performing three rounds of each level. Each round comprised a series of 40 upper-case  
330 consonants presented for 2.5 seconds, during which participants were required to respond by  
button press indicating whether each letter was a “target” or “non-target”. After response, the  
stimulus was replaced by a central fixation cross until the subsequent stimulus was presented, 3  
seconds after the last stimulus onset. Each N-back level was referred to by one of four lower-  
case vowels (‘the *a* task’ for the 1-back, ‘the *e* task’ for the 2-back, etc.). Vowels were used as  
335 task labels rather than explicit, numeric representations for each level to avoid anchoring  
confounds while participants considered (numeric) subjective values in the subsequent  
discounting and gaze-decision trials.

*Discounting Task* During the discounting task, participants were asked, on-drug/placebo, to  
choose between repeating one of each of the higher levels of the N-back task ( $N = 2-4$ ) for one  
340 of two larger amounts of money (€2 or €4) and a lower level ( $N = 1-2$ ) for a smaller, variable  
amount of money on each trial. On the first trial for each high-effort / low-effort pair the initial  
offer for the low-effort offer was one half the offer for the high-effort offer. After each choice,  
the offer amount for the low-effort offer was adjusted down if it was chosen, and adjusted up if it  
was not chosen until the participant was indifferent between the offers. The magnitude of the  
345 adjustment was half as much on each trial such that the offer converged to the indifference point  
over 5 trials. The adjusted offer after the fifth decision trial was taken to be the indifference  
point, and this quantified the subjective value of the high-effort, relative to the low-effort offer.  
For example, if a participant were indifferent between €4 for the 3-back, and €1.13 for the 1-  
back, the subjective cost of the 3- versus the 1-back is €2.87, and the subjective value of the €2  
350 offer for the 3-back was €1.13. Note that when testing the effect of the offer amount on  
subjective values, we normalized the subjective value by the base offer (e.g.  $€1.13 / €4 = 0.2825$ ).  
In total, participants completed 50 discounting trials comprising 5 decision trials for  
each of 5 high-/low-effort pairs and each of 2 base offer amounts. All discounting trials were  
self-paced.

355 *Gaze-Decision Task* After we established indifference points, participants completed an  
additional 168 self-paced choice trials while we monitored their gaze. Offers were tailored to  
participants’ indifference points to alternately bias high-cost / high-benefit offer selection, or

low-cost / low-benefit selection on half of the trials. Offers were further designed to manipulate choice difficulty, with trials varying from difficult discriminations – in which offers were close in subjective value, to easy discrimination trials – in which subjective offer values were maximally different. This design ensured that we sampled from across the psychometric choice function, but also emphasized difficult discrimination trials maximizing sensitivity to, for example, subtle drug and gaze effects on choice. Specifically, we included 18 easy discrimination trials to ensure that participants were paying attention: 9 in which we offered either the same offer amount for the easy and hard task (participants should mostly choose the easy task), and 9 in which we offered €0 for the low-effort offer (participants should mostly choose the hard task). Indeed, as anticipated, participants overwhelmingly selected the higher value offer on these easy decision trials, whether that offer was the high-effort alternative (94.2% of trials across all drugs and participants) or the low-effort alternative (90.1% of trials). We also included 150 difficult discrimination trials: 75 in which we offered 20–30% below the indifference point for the low-effort offer (percentage sampled from a uniform distribution spanning the range), and another 75 trials in which we offered 30–50% of the difference between the indifference point and the high-effort offer above the indifference point (see Fig. 2A for an example set of offer pairs). These ranges were used because prior piloting revealed that they were close enough to indifference that participants made choices contrary to offer biases at a desired rate (we designed our ranges to achieve a 20–30% rate of “anti-bias” trials; overall participants chose against offer biases 30.6% of the time). The ranges for bias high-effort and bias low-effort trials were asymmetric because prior piloting further revealed that for a given range (% difference from the indifference point), participants tended to select the high-effort offers at a higher rate, on trials in which we biased high-effort selection, than the rate at which they selected the low-effort offers on trials in which we biased low-effort selection. Indeed, this is expected if participants are relatively more sensitive to benefits than costs: for a given range, participants will tend to select the high-effort option more often on bias high-effort trials because the psychometric choice function has a steeper slope than on bias low-effort trials (see Fig. 2). Thus, we increased the range to more strongly bias low-effort selection on bias low-effort trials to achieve greater balance in overall rate of high- and low-effort selection rates. Participants’ choices reliably reflected offer biases. However, the final anti-bias choice rate on difficult, bias high-effort trials was 18.9%, and on bias low-effort trials was 42.4%, indicating that the propensity to select high-effort offer was not fully offset by the stronger percentage range of offer biases used to bias low-effort selection.

Participants had up to 9 seconds to indicate their preference by button press, after offer onset, before a trial would time-out and advance to the next trial. Across all sessions and participants, only 0.059% of trials (6 trials on placebo, 4 trials on methylphenidate, and 8 on placebo;  $\chi^2_{\text{proportions}} = 1.2 \times 10^{-4}$ ,  $P = 1.00$ ) timed-out and were excluded from analyses. When participants responded, the selected offer was highlighted by a rectangular frame for 0.5 seconds, and then offers were replaced by a central fixation cross indicating the start of the next trial. Participants’ decision trials were broken up into 3 runs of 56 trials each with breaks for rest and to recalibrate eye tracking in between.

*Eye Tracking* Participants’ gaze was monitored during the gaze-decision task using an Eyelink 1000 infrared camera (SR Research; Ottawa, Ontario). Participants rested their head on a table-mounted chin rest with their eyes approximately 76 cm from a 61 cm LCD monitor; gaze position readings were recalibrated at the beginning of each run of decision trials. At the beginning of each choice trial, a central fixation cross was presented, on which participants were

required to fixate for 1 second to initiate the trial. After successfully holding fixation for 1  
405 second, two offers were presented, each comprising an amount in Euros, and an N-back task  
level, with the four pieces of information displayed in the four corners of the screen. Offers were  
left-right lateralized, while cost (e.g. ‘a’, ‘e’, etc.) and benefit (e.g. €1.70 and €2.00) information  
was presented on either the top or bottom on each trial. Positions of the costs versus benefits and  
410 side of the high-cost, high-benefit offer were selected randomly on each trial. Each piece of  
information was centered 11 degrees away from the central fixation cross, and subtended  
between approximately 0.37—1.37 degrees of visual angle. Gaze position was sampled every  
0.003 seconds, and was down-sampled to every 0.01 seconds for analyses.

To identify fixations, we considered both the sustained duration and location of gaze  
samples. First, samples within approximately 23 degrees of visual angle of the stimulus centroid  
415 (fully encompasses “central” and “near peripheral” vision) were tagged as directed at the  
relevant choice feature. Then, we counted any interval of gaze directed continuously at the same  
feature for longer than 70 ms as a fixation, reasoning that anything shorter would be well below  
minimum duration of typical fixations and must reflect a passing saccade. These liberal  
thresholds ensured that we counted every possible sample of gaze that may have contributed to  
420 information acquisition towards our proportion gaze measures. Fig. 3A shows a typical example  
trial and gaze samples counted as either at, or away from offer information.

*PET Imaging* We used the radiotracer [<sup>18</sup>F]-fluoro-DOPA (F-DOPA) and a Siemens mCT  
PET-CT scanner to measure participants’ dopamine synthesis capacity. Images were captured  
using 40 slice CT, 4 x 4 mm voxels, with 5 mm slice thickness. One hour prior to F-DOPA  
425 injection, participants received 150 mg carbidopa to reduce decarboxylase activity and 400 mg  
entacapone to reduce peripheral COMT activity with the intention of increasing the  
bioavailability of the radiolabeled F-DOPA and enhance signal to noise. Following the  
Pavlovian-to-instrumental task, then entacapone and carbidopa administration, participants  
performed a cognitive task battery while waiting for peak drug efficacy. About 50 minutes after  
430 administration, participants were positioned to lie down comfortably and a nuclear medicine  
technician administered a low dose CT to correct attenuation of PET images. Subsequently,  
participants were administered a bolus injection of 185 MBq (5 mCi) max F-DOPA into the  
antecubital vein. Over the course of 89 minutes, we then collected 4 1-minute frames, 3 2-minute  
frames, 3 3-minute frames, and 14 5-minute frames. Data were reconstructed with weighted  
435 attenuation correction, time-of-flight correction, correction for scatter, and smoothed with a 3  
mm full-width-half-max kernel.

Data were preprocessed using SPM12. All frames were realigned to the middle (11th) frame  
to correct for head movement. Realigned frames were then co-registered to the structural MRI  
scan, using the mean PET image of the first 11 frames, which have better contrast outside the  
440 striatum than the later frames. Presynaptic dopamine synthesis capacity was quantified as F-  
DOPA influx rate ( $K_i$ ;  $\text{min}^{-1}$ ) per voxel using Gjedde-Patlak linear graphical analysis (39) for the  
frames of 24—89 minutes. These  $K_i$  values represent the amount of tracer accumulated relative  
to the reference region of cerebellum grey matter. The reference region was obtained using  
FreeSurfer segmentation of each individual’s high resolution anatomical MRI scan.  $K_i$  maps  
445 were spatially normalized to MNI space and smoothed using an 8 mm FWHM Gaussian kernel.

After preprocessing and normalization to MNI space,  $K_i$  values were extracted from masks  
defining regions of interest based on an independent, functional connectivity-based parcellation  
of the striatum (25). In particular, we extracted  $K_i$  values from 3 striatal regions – the caudate  
nucleus (817 voxels), the putamen (1495 voxels), and the ventral striatum / nucleus accumbens

450 (607 voxels), and averaged across all voxels in each region for individual difference analyses. Our individual difference analyses focus on the caudate nucleus. All results survive Bonferroni correction across the three striatal sub-regions with the sole exceptions being the impact of caudate nucleus Ki on the benefits effect on the drift rate ( $P \times 3 = P_{\text{Bonferroni}} = 0.12$ ) and the effect of Ki values on subjective values in the placebo session ( $P_{\text{Bonferroni}} = 0.066$ ; along with lower-  
 455 power AUC analyses collapsing across load levels and offer amounts). Nevertheless, the influence of caudate Ki on subjective values in the discounting phase is confirmed by hierarchical, trial-wise regression analyses across sessions ( $P_{\text{Bonferroni}} = 0.022$ ), revealing robust effects, surviving correction for multiple comparisons.

460 *Simulating Dopamine's Effects on Sensitivity to Costs and Benefits* As noted in the main text, we tested the hypothesis that striatal dopamine has asymmetric effects on benefits versus costs sensitivity during decision-making. To simulate these effects, we adopted the Opponent Actor Learning Model (OpAL; 5) according to which a subjective action value is given by a linear combination of costs and benefits, where the cost and the benefits terms have distinct weights ( $\beta_N$  and  $\beta_G$ , respectively). To model our decision-making task, we thus consider the  
 465 subjective value of an offer ( $V_p$ ) during the gaze-decision task to be:

$$V_p = \beta_G ben_p - \beta_N cos_p \quad \text{Eqn. 2}$$

Here  $ben_p$  is the benefit of offer  $p$  in terms of objective monetary amount (€), and  $cos_p$  is the objective N-back task level. The weights thus convert objective measures into subjective benefits and costs and can moreover be modulated independently (e.g., by dopamine). Following (5), we  
 470 simulated increases in dopamine release as an increase in the ratio of  $\beta_G$  to  $\beta_N$  (Fig. 2A). We then mapped values to choice probabilities via softmax, such that the probability of choosing the low-effort offer ( $lo$ ) versus the high-effort offer ( $hi$ ), is:

$$p(lo) = \frac{e^{V_{lo}}}{e^{V_{lo}} + e^{V_{hi}}} \quad \text{Eqn. 3}$$

To specifically simulate the choice probability functions in Fig. 2B, we assumed a high-  
 475 effort offer amount, and a fixed difference in costs, and computed the low-effort offer amount required for indifference for a given ratio of  $\beta_G$  to  $\beta_N$ . Next, we computed the low effort offer amount required for a given proportional shift along the x-axis (the difference in subjective values), as the fraction of the distance between the indifference point and the low-effort offer bounds:  $\text{€}0 - ben_{hi}$ . Finally, we computed the subjective value of this low-effort offer using Eqn.  
 480 2 and the probability of the high-effort offer selection ( $p(hi) = 1 - p(lo)$ ) using Eqn. 3.

*Hierarchical Regression Analyses* All hierarchical regression models were fully random and fit using the lme4 package version 1.1-17 for R. The following were reported in the main text.

485 For the discounting task, we estimated the effect of z-scored high-effort offer amount ( $amt$ ), drug as a factor ( $drug$ ), z-scored load difference ( $ldiff$ ), and session number as a factor ( $S$ ; in the following equation, session is dummy coded depending on which session the trial comes from, e.g. if Session 2:  $S_{2i} = 1$ ,  $S_{3i} = 0$ , etc.) on the subjective value ( $SV_{ij}$ ; given here as the indifference point divided by the offer amount) of a high-effort offer  $i$ , for participant  $j$  by fitting the following hierarchical regression model:

$$490 \quad SV_{ij} = \beta_{0j} + \beta_{1j} amt_i + \beta_{2j} drug_i + \beta_{3j} ldiff_i + \beta_{4j} S_{2i} + \beta_{5j} S_{3i} + \varepsilon_{ij} \quad \text{Eqn. 4}$$

Additionally, while all terms have subject-specific intercepts, we also allowed slopes to vary by participant, with z-scored caudate dopamine synthesis capacity ( $cDA$ ) as a subject-level predictor of the intercept and drug terms, thus modeling a cross-level interaction of dopamine synthesis capacity and drug status:

495 
$$\beta_{1j} = \alpha_{10} + \alpha_{11}cDA + u_{1j} \quad \text{Eqn. 5}$$

and a main effect of dopamine synthesis on subjective value.

$$\beta_{0j} = \alpha_{00} + \alpha_{01}cDA + u_{0j} \quad \text{Eqn. 6}$$

Note that  $u$  and  $\varepsilon$  are error terms. A full list of fitted model fixed effect parameters and standard errors is provided in Table S1.

500 For the gaze-decision task, we fit a hierarchical logistic regression to estimate the effects of z-scored relative (high-effort offer versus low-effort offer) benefits ( $ben$ ) and costs ( $cost$ ), caudate dopamine synthesis capacity, and drug status on binary choice ( $Chc$ ) of the high-effort offer on trial  $i$  for participant  $j$ , controlling for session number.

505 
$$Chc_{ij} = \beta_{0j} + \beta_{1j}ben_i + \beta_{2j}cost_i + \beta_{3j}drug_i + \dots$$

$$\beta_{4j}drug_i * ben_i + \beta_{5j}drug_i * cost_i + \beta_{6j}S_{2i} + \beta_{5j}S_{3i} + \varepsilon_{ij} \quad \text{Eqn. 7}$$

Note that we specified our intercept term in the same way as in the previous hierarchical regression, allowing for a cross-level main effect of dopamine synthesis capacity (Eqn. 6). In addition, we allowed for cross-level interactions to test how dopamine synthesis capacity modulated both benefit and cost terms,  $k$ . Fitted model results are provided in Table S2.

510 
$$\beta_{k \in \{1,2\}j} = \alpha_{k0} + \alpha_{k1}cDA + u_{kj} \quad \text{Eqn. 8}$$

With respect to gaze in the gaze-decision task, we first fit a hierarchical logistic regression to understand how gaze and offer values influenced choice. Specifically, we tested for effects of z-scored proportion dwell times on the high-effort offer ( $hG$ : high-effort offer dwell time minus low-effort offer dwell time, normalized by total dwell time) and of z-scored combined offer value ( $totSV$ ), and their interaction, as well as the difference in subjective values ( $diffSV$ : high-effort minus low-effort subjective value), and session number predicting binary choice ( $Chc$ ). Fitted model results are provided in Table S3.

515 
$$Chc_{ij} = \beta_{0j} + \beta_{1j}diffSV_i + \beta_{2j}totSV_i + \beta_{3j}hG_i + \beta_{4j}totSV_i * hG_i + \beta_{5j}S_{2i} + \beta_{6j}S_{3i} + \varepsilon_{ij}$$

Eqn. 9

520 To analyze the relationship between dynamic gaze patterns, dopamine, and choice, we began by estimating average fixation patterns at every time point following offer onset (the frequency of fixating one of the four information quadrants) across trials, for every subject. We computed separate averages for each drug session to test for relationships with dopamine, and furthermore computed separate averages for choose-high versus choose-low effort trials so that

525 we could test for a relationship with choice. These averages, when further plotted as means and standard errors across participants, revealed a clear pattern of preferential gaze at benefit versus cost information in an interval between 250 ms and 450 ms after offer onset (Fig. 3D). We then asked whether this pattern differed by dopamine status and choice by fitting a hierarchical regression testing whether benefits versus cost gaze averages ( $bcG_i$ : proportion of trials looking

530 at benefits versus cost information, averaged across all time points in the 250—450 ms window, for average  $i$ ) varied by choice type ( $cType$ : high-effort versus low-effort chosen) and drug as within-participant factors and dopamine synthesis capacity as a between-participants continuous predictor. Here, as above, all first-level predictors vary by participant ( $j$ ). Fitted model results are provided in Table S4.

535 
$$bcG_{ij} = \beta_{0j} + \beta_{1j}drug_i + \beta_{2j}cType_i + \beta_{3j}drug_i * cType_i + \varepsilon_{ij} \quad \text{Eqn. 10}$$

As above, we allowed for randomly-varying main effects of caudate dopamine synthesis capacity (Eqn. 4). We further allowed the effect of drug and choice type to vary randomly by dopamine synthesis capacity (as in Eqn. 6), and the drug by choice type interaction to vary non-randomly by caudate synthesis capacity.

$$540 \quad \beta_{3j} = \alpha_{30} + \alpha_{31}cDA \quad \text{Eqn. 11}$$

Given the number of averages we fit in this model (one for each subject, drug session, and choice type), allowing the drug by choice type interaction to also vary randomly by subject required too many degrees of freedom to be estimated. However, the negative three-way interaction we observed (dopamine synthesis capacity by choice type by methylphenidate; Table S4), is entirely  
 545 consistent with complementary, non-hierarchical models we estimated separately for the methylphenidate and placebo sessions. In those models, we found that the two-way interaction between dopamine synthesis capacity and choice type predicting higher average gaze at benefits versus costs on methylphenidate was an order of magnitude smaller ( $\beta = 0.037$ ;  $P = 0.86$ ) than it was on placebo ( $\beta = 0.44$ ;  $P = 0.031$ ).

550 *Drift Diffusion Modeling* To understand how value and gaze combine to influence evidence accumulation during choice, we used the Hierarchical Drift Diffusion Modeling (HDDM) package (36). HDDM utilizes Markov Chain Monte Carlo sampling for Bayesian estimation of both group- and participant-level parameters (drift rate, threshold, etc.). Since our primary questions were about how drift rate varied across trials, we used the HDDMRegressor  
 555 method which enables specifying trial-wise predictors of DDM parameters, to ask how drift rate varied by gaze and value measures.

To adjudicate between competing models by which gaze either amplifies the effect of attended versus unattended values on choice, or merely reflects implicit preferences, we fit drift diffusion models in which we allowed the drift rate to vary, respectively, by either multiplicative  
 560 or additive combinations of gaze and value. Moreover, we also sought to adjudicate between competing models by which choice is driven by visual attention to either alternative offers, or offer attributes. Thus, competing models had drift rate varying by interactions of gaze and either net offer values (benefits minus costs) or attribute values.

Note that all trials were modeled except for non-response trials and trials in which  
 565 participants responded too rapidly – based on a cutoff of reaction times  $> 250$  ms. Only 17 out of 23767 trials were thus excluded from the HDDM modeling, or 0.071%.

The first, simplest model we considered had an additive combination of proportional gaze (proportion of total gaze at any piece of information in a trial) at offers  $A$  ( $g_A$ ) versus  $B$  ( $g_B$ ) and net offer values ( $V_A$  and  $V_B$ ) predicting drift rates towards offer  $A$  for participant  $j$  on trial  $i$  ( $v_i$ ).  
 570 Note that  $A$  was the higher value offer (regardless of whether it was the high-cost, high-benefit, or low-cost, low-benefit offer).

$$v_{ij} \sim \beta_{0j} + \beta_{1j}(g_A - g_B)_i + \beta_{2j}(V_A - V_B)_i \quad \text{Eqn. 12}$$

We also considered a model in which gaze at offers and net offer values interacted multiplicatively. This model is equivalent to the attention drift diffusion model (aDDM) of gaze-  
 575 value interactions whereby gaze discounts the value of the unattended relative to the attended offer (23). In this model, the final term ( $\beta_2$ ) gives the effect of the value difference between  $A$  and  $B$  as a function of looking at  $B$  versus  $A$ , and, as noted in prior work (24), the ratio  $\beta_1/\beta_2$  gives the fraction by which an offer is discounted when it is unattended relative to when it is attended.

$$580 \quad v_{ij} \sim \beta_{0j} + \beta_{1j}(g_A V_A - g_B V_B)_i + \beta_{2j}(g_B V_A - g_A V_B)_i \quad \text{Eqn. 13}$$

Next, we considered variants of these two models where visual attention is directed at offer attributes: gaze at the benefits ( $g_{BenA}$ ) and the costs ( $g_{CostA}$ ) of offer  $A$ . Here, the additive model takes the following form.

$$585 \quad v_{ij} \sim \beta_{0j} + \beta_{1j}(Ben_A - Ben_B)_i + \beta_{2j}(Cost_A - Cost_B)_i + \dots \\ \beta_{3j}(g_{BenA} - g_{BenB})_i + \beta_{4j}(g_{CostA} - g_{CostB})_i \quad \text{Eqn. 14}$$

The interactive, attribute-wise variant model is given by the following.

$$v_{ij} \sim \beta_{0j} + \beta_{1j} g_{Ben} (Ben_A - Ben_B)_i + \beta_{2j} g_{Cost} (Cost_A - Cost_B)_i + \dots \\ \beta_{3j} g_{Cost} (Ben_A - Ben_B)_i + \beta_{4j} g_{Ben} (Cost_A - Cost_B)_i \quad \text{Eqn. 15}$$

590 We furthermore considered a model which had both additive and multiplicative combinations of gaze and value. The net value model is identical to Eqn. 13, with the addition of a simple gaze term. This model captures the possibility that gaze and value combine dynamically across the trial (e.g. multiplicatively early in a trial as gaze amplifies value differences and additively late in a trial as gaze comes to reflect preferences as they form).

$$v_{ij} \sim \beta_{0j} + \beta_{1j} (g_A V_A - g_B V_B)_i + \beta_{2j} (g_B V_A - g_A V_B)_i + \beta_{3j} (g_A - g_B)_i \quad \text{Eqn. 16}$$

595 Finally, we also considered a model with both additive and multiplicative combinations of gaze and attribute values. This model, as noted in the main text, was the winning model with respect to AIC values across all sessions, and across individual drug sessions as well (Table S5).

AIC scores for data estimated across all sessions and in each session individually revealed that net value models consistently fit worse than attribute-wise value models, regardless of whether the models involved additive or multiplicative combinations of gaze and values. Also, while additive models consistently performed better than purely multiplicative models, the scores for combined additive plus multiplicative models were always best. Furthermore, supporting our hypothesis that gaze and value combine multiplicatively early in a trial, and additively late in a trial, we found that AIC scores were better for the multiplicative and multiplicative plus additive models based on pre-bifurcation gaze data and better for the additive model based on post-bifurcation gaze data (Table S6).

In addition to AIC scores, key qualitative features of our gaze data support a combined additive plus multiplicative model. First, the effect of gaze at costs on choice argues for either an additive or at least an additive plus multiplicative model rather than a purely multiplicative model. Namely, because load discounted the subjective value of offers, and the cost attribute necessarily carries a negative subjective valence, gaze at costs should discourage high-effort selection. A purely multiplicative model predicts that the more participants fixate a negative attribute, they less likely they should be to choose it. Nevertheless, we found clear evidence that the more participants fixated the costs of the high-cost, high-benefit offer, the more likely they were to choose it (Fig. 3B—C). Thus, a purely multiplicative model would not capture the effect of gaze at cost information. And yet, qualitative gaze and choice patterns also support multiplicative contributions. Specifically, for example, a fully-random, hierarchical regression of gaze and attribute values on choice reveals that the effect of costs on choice grows the more participants fixate costs. Fitted model weights show that selection of the higher-valued offer is predicted by the relative benefits of the offer ( $\beta = 4.4$ ,  $P < 2.2 \times 10^{-16}$ ), the relative costs ( $\beta = -3.3$ ,  $P < 2.2 \times 10^{-16}$ ), and interactions reveal that while increasing proportion gaze at costs does not modulate the effect of benefits on choice ( $\beta = 0.14$ ,  $P = 0.35$ ), proportion gaze at costs did reliably increase the effect of costs on choice ( $\beta = -0.40$ ,  $P = 0.0056$ ). Thus, multiplicative combinations are needed to account for these types of interactions.

625 In addition to comparing quantitative and qualitative measures of model fit, we also performed posterior predictive checks to ensure that our selected model could reproduce our data. To do so, we used our selected model to simulate 500 data sets for every trial and confirmed that statistics of our observed data matched expectations from the simulations. For choices, we ensured that simulations closely matched the observed rate at which participants selected the higher-valued offer as a function of offer value difference and above- versus below- median proportion gaze at the higher valued offer (Fig. 4B). We also ensured that the following



635 observed statistics matched our simulations for reaction times: the 10<sup>th</sup>, 30<sup>th</sup>, 50<sup>th</sup>, 70<sup>th</sup> and 90<sup>th</sup>  
percentile of the reaction time distributions, as well as the standard deviation of the mean  
reaction time, separately for distributions in which the participant did and did not select the  
higher-valued offer on each trial. Furthermore, a comparison of simulated and observed reaction  
time distributions for trials in which participants selected the higher and lower valued offers  
demonstrates excellent agreement between the model and the data (Fig. 4C).

640 *Breaking up Trials According to Gaze Bifurcation* To test the hypothesis that gaze and  
value multiplicatively interact early in a trial and combine additively late in a trial, we broke  
trials into early and late gaze phases according to the time at which participants, on average,  
begin to commit their gaze to the chosen offer, prior to responding. We used a peak-finding  
method to identify the point at which participants' gaze towards the unchosen option peaked, on  
645 average, for every subject and every drug session, before declining. For each participant and  
each session, we first computed timeseries averaging the proportion of trials fixating either the  
high- or low-effort offer, at every time point, time-locked to response. Next, we smoothed each  
of these timeseries using a two-sided linear filter. Then, we found the time point corresponding  
to the maximum proportion of trials fixating the unchosen offer in the 2 seconds prior to  
response. Across participants, the mean early-late split on placebo occurred, on average, 776 ms  
650 prior to response (SD = 360 ms), on methylphenidate it occurred 864 ms prior (SD = 344 ms),  
and on sulpiride it occurred 746 ms prior to response (SD = 306 ms). There was no difference in  
the mean split time between placebo and either methylphenidate ( $t_{\text{paired}} = 1.46$ ,  $p = 0.15$ ) or  
sulpiride ( $t_{\text{paired}} = -0.51$ ,  $p = 0.61$ ). However, bifurcation was earlier (with respect to the response  
time) on methylphenidate than on sulpiride ( $t_{\text{paired}} = 2.61$ ,  $p = 0.011$ ). We then split each  
655 participants' gaze data according to whether samples were recorded before or after participant-  
specific split times prior to response. On trials with response times faster than participant-  
specific split times, we simply cut trials in half.

## References and Notes:

- 660 1. W. Kool, J. T. McGuire, Z. B. Rosen, M. M. Botvinick, Decision making and the  
avoidance of cognitive demand. *Journal of Experimental Psychology-General*. **139**, 665–  
682 (2010).
2. A. Westbrook, D. Kester, T. S. Braver, What Is the Subjective Cost of Cognitive Effort?  
Load, Trait, and Aging Effects Revealed by Economic Preference. *PLoS One*. **8**, e68210  
(2013).
- 665 3. M. Apps, L. L. Grima, S. Manohar, M. Husain, The role of cognitive effort in subjective  
reward devaluation and risky decision-making. *Scientific Reports* (2015),  
doi:10.1038/srep16880.
4. J. D. Salamone *et al.*, The pharmacology of effort-related choice behavior: Dopamine,  
depression, and individual differences. *Behavioural Processes*. **127**, 3–17 (2016).
- 670 5. A. G. E. Collins, M. J. Frank, Opponent actor learning (OpAL): Modeling interactive  
effects of striatal dopamine on reinforcement learning and choice incentive. *Psychological  
Review*. **121**, 337–366 (2014).
6. M. J. Frank, R. C. O'Reilly, A mechanistic account of striatal dopamine function in

human cognition: Psychopharmacological studies with cabergoline and haloperidol. *Behavioral Neuroscience*. **120**, 497–517 (2006).

- 675 7. R. Cools, Role of Dopamine in the Motivational and Cognitive Control of Behavior. *The Neuroscientist*. **14**, 381–395 (2008).
8. A. Westbrook, M. Frank, Dopamine and proximity in motivation and cognitive control. *Current Opinion in Behavioral Sciences*. **22**, 28–34 (2018).
- 680 9. N. D. Volkow *et al.*, Motivation Deficit in ADHD is Associated with Dysfunction of the Dopamine Reward Pathway. *Molecular Psychiatry*. **16**, 1147–1154 (2011).
10. P. J. Cocker, J. G. Hosking, J. Benoit, C. A. Winstanley, Sensitivity to Cognitive Effort Mediates Psychostimulant Effects on a Novel Rodent Cost/Benefit Decision-Making Task. *Neuropsychopharmacology*. **37**, 1825–1837 (2012).
- 685 11. R. Cools, The costs and benefits of brain dopamine for cognitive control. *WIREs Cogn Sci*. **7**, 317–329 (2016).
12. A. Westbrook, T. S. Braver, Dopamine Does Double Duty in Motivating Cognitive Effort. *Neuron*. **89**, 695–710 (2016).
13. E. Aarts *et al.*, Aberrant reward processing in Parkinson's disease is associated with dopamine cell loss. *Neuroimage*. **59**, 3339–3346 (2012).
- 690 14. E. Aarts *et al.*, Greater striatal responses to medication in Parkinson's disease are associated with better task-switching but worse reward performance. *Neuropsychologia*. **62**, 390–397 (2014).
15. S. G. Manohar *et al.*, Reward Pays the Cost of Noise Reduction in Motor and Cognitive Control. *Current Biology*. **25**, 1707–1716 (2015).
- 695 16. M. H. M. Timmer, E. Aarts, R. A. J. Esselink, R. Cools, Enhanced motivation of cognitive control in Parkinson's disease. *European Journal of Neuroscience*. **48**, 2374–2384 (2018).
17. S. McGuigan *et al.*, Dopamine restores cognitive motivation in Parkinson's disease. *Brain*. **5**, 16880 (2019).
- 700 18. M. I. Froböse *et al.*, Catecholaminergic modulation of the avoidance of cognitive control. *Journal of Experimental Psychology-General*. **147**, 1763–1781 (2018).
19. J. G. Hosking, S. B. Floresco, C. A. Winstanley, Dopamine Antagonism Decreases Willingness to Expend Physical, but not Cognitive, Effort: A Comparison of Two Rodent Cost/Benefit Decision-Making Tasks. *Neuropsychopharmacology*. **40**, 1005–1015 (2014).
- 705 20. C. Varazzani, A. San-Galli, S. Gilardeau, S. Bouret, Noradrenaline and Dopamine Neurons in the Reward/Effort Trade-Off: A Direct Electrophysiological Comparison in Behaving Monkeys. *Journal of Neuroscience*. **35**, 7866–7877 (2015).

21. R. Cools, M. D'Esposito, Inverted-U-Shaped Dopamine Actions on Human Working Memory and Cognitive Control. *Biological Psychiatry*. **69**, e113–e125 (2011).
- 710 22. R. M. Roe, J. R. Busemeyer, J. T. Townsend, Multialternative decision field theory: A dynamic connectionist model of decision making. *Psychological Review*. **108**, 370 (2001).
23. I. Krajbich, C. Armel, A. Rangel, Visual fixations and the computation and comparison of value in simple choice. *Nature Neuroscience*. **13**, 1292–1298 (2010).
- 715 24. J. F. Cavanagh, T. V. Wiecki, A. Kochar, M. J. Frank, Eye Tracking and Pupillometry Are Indicators of Dissociable Latent Decision Processes. *Journal of Experimental Psychology: General*. **143**, 1476–1488 (2014).
25. P. Piray, H. E. M. den Ouden, M. E. van der Schaaf, I. Toni, R. Cools, Dopaminergic Modulation of the Functional Ventrodorsal Architecture of the Human Striatum. *Cerebral Cortex*. **2010**, bhv243 (2017).
- 720 26. N. D. Volkow *et al.*, Dopamine Transporter Occupancies in the Human Brain Induced by Therapeutic Doses of Oral Methylphenidate. *American Journal of Psychiatry*. **155**, 1325–1331 (1998).
27. N. D. Volkow *et al.*, Therapeutic Doses of Oral Methylphenidate Significantly Increase Extracellular Dopamine in the Human Brain. *Journal of Neuroscience*. **21**, 1–5 (2001).
- 725 28. B. Moghaddam, B. S. Bunney, Acute Effects of Typical and Atypical Antipsychotic Drugs on the Release of Dopamine from Prefrontal Cortex, Nucleus Accumbens, and Striatum of the Rat: An In Vivo Microdialysis Study. *Journal of Neurochemistry*. **54**, 1755–1760 (1990).
- 730 29. Q. Wu *et al.*, Concurrent Autoreceptor-Mediated Control of Dopamine Release and Uptake during Neurotransmission: An In Vivo Voltammetric Study. *The Journal of Neuroscience*. **14**, 6272–6281 (2002).
30. C. Roberts, R. Cummins, Z. Gnoffo, J. N. C. Kew, Dopamine D3 receptor modulation of dopamine efflux in the rat nucleus accumbens. *European Journal of Pharmacology*. **534**, 108–114 (2006).
- 735 31. G. Jocham, T. A. Klein, M. Ullsperger, Dopamine-Mediated Reinforcement Learning Signals in the Striatum and Ventromedial Prefrontal Cortex Underlie Value-Based Choices. *Journal of Neuroscience*. **31**, 1606–1613 (2011).
32. C. Eisenegger *et al.*, Role of Dopamine D2 Receptors in Human Reinforcement Learning. **39**, 2366–2375 (2014).
- 740 33. Y. Niv, N. D. Daw, D. Joel, P. Dayan, Tonic dopamine: opportunity costs and the control of response vigor. *Psychopharmacology*. **191**, 507–520 (2007).
34. S. Shimojo, C. Simion, E. Shimojo, C. Scheier, Gaze bias both reflects and influences

preference. *Nature Neuroscience*. **6**, 1317–1322 (2003).

35. S. M. Smith, I. Krajbich, Gaze Amplifies Value in Decision Making. *Psychological Science*. **30**, 116–128 (2018).
- 745 36. T. V. Wiecki, I. Sofer, M. J. Frank, HDDM: Hierarchical Bayesian estimation of the Drift-Diffusion Model in Python. *Frontiers in Neuroinformatics*. **7**, 1–10 (2013).
37. J. M. Swanson, N. D. Volkow, Serum and brain concentrations of methylphenidate: implications for use and abuse. *Neuroscience and Biobehavioral Reviews*. **27**, 615–621 (2003).
- 750 38. F.-A. Wiesel, G. Alfredsson, M. Ehrnebo, G. Sedvall, Prolactin response following intravenous and oral sulpiride in healthy human subjects in relation to sulpiride concentrations. *Psychopharmacology*. **76**, 44–47 (1982).
39. C. S. Patlak, R. G. Blasberg, J. D. Fenstermacher, Graphical Evaluation of Blood-to-Brain Transfer Constants from Multiple-Time Uptake Data. *Journal of Cerebral Blood Flow & Metabolism*. **3**, 1–7 (1983).
- 755 40. L. Schmidt, M. Lebreton, M.-L. Cléry-Melin, J. Daunizeau, M. Pessiglione, Neural Mechanisms Underlying Motivation of Mental Versus Physical Effort. *PLoS Biology*. **10**, e1001266 (2012).
41. A. Westbrook, B. Lamichhane, T. Braver, The Subjective Value of Cognitive Effort is Encoded by a Domain-General Valuation Network. *Journal of Neuroscience*, 3071–18 (2019).
- 760 42. M. M. Silveira, M. Tremblay, C. A. Winstanley, Dissociable contributions of dorsal and ventral striatal regions on a rodent cost/benefit decision-making task requiring cognitive effort. *Neuropharmacology*. **137**, 322–331 (2018).

765 **Acknowledgments:** We wish to thank the individuals who participated in this study. **Funding:** NWO VICI Grant, 453-14-005 (2015/01379/VI) to R.C.; NIH Grant F32MH115600-01A1 to A.W., and NIH Grant R01MH080066 to M.J.F.; **Author contributions:** conceptualization: R.C., A.W., and M.J.F., data curation: J.I.M., R.v.d.B., L.H., D.P., formal analysis: A.W., R.v.d.B., R.C., M.J.F., funding acquisition: R.C., A.W., investigation: J.I.M., R.v.d.B., L.H., D.P., project administration: J.I.M. and R.C., software: A.W., writing: A.W., M.J.F, R.C., supervision: R.C. and M.J.F.; **Competing interests:** Authors declare no competing interests.; and **Data and materials availability:** All data is available in the main text or the supplementary materials.

770

## Supplemental Results:

775 *Discounting by Drug and Caudate Nucleus Dopamine Synthesis Capacity* Participants with below-median dopamine synthesis capacity in the caudate nucleus discounted more steeply at every level of the N-back task in comparison with participants with above-median dopamine synthesis capacity, on placebo (Fig. S1A). This analysis is consistent with our area under the curve analysis reported in the main text. Also, there were no group differences on methylphenidate or sulpiride at any level as both drugs reliably increased the subjective offer values / indifference points selectively for participants with low dopamine synthesis capacity  
780 (Fig 1D), thereby erasing group differences (Fig. S1B—C).

*Discounting by Dopamine Synthesis Capacity Outside the Caudate Nucleus* Outside of the caudate nucleus, dopamine synthesis capacity (Ki) in neither the putamen nor the ventral striatum / nucleus accumbens showed robust relationships with subjective offer values (Fig. S2).  
785 As reported in the main text, during the discounting phase, the caudate nucleus Ki values predicted offer subjective values (controlling for session order, Eqn. 4;  $\beta = 0.070$ ,  $P = 0.0072$ ) and these individual differences interacted with both methylphenidate ( $\beta = -0.069$ ,  $P = 0.0042$ ) and sulpiride versus placebo ( $\beta = -0.10$ ,  $P = 8.3 \times 10^{-4}$ ). By contrast in the putamen, there were no main effects of Ki values ( $\beta = 0.037$ ,  $P = 0.17$ ), and no reliable interactions with either  
790 methylphenidate ( $\beta = -0.042$ ,  $P = 0.10$ ) or sulpiride versus placebo ( $\beta = -0.054$ ,  $P = 0.096$ ). Finally, in the nucleus accumbens, there was no main effect of Ki values ( $\beta = 0.011$ ,  $P = 0.69$ ), and no reliable interaction with sulpiride ( $\beta = -0.034$ ,  $P = 0.27$ ). There was a negative interaction between Ki and methylphenidate versus placebo ( $\beta = -0.059$ ,  $P = 0.029$ ) in the nucleus accumbens, however this result does not survive Bonferroni correction. Voxel-wise analyses are  
795 presented (Fig. S1) to show main effects of Ki on placebo and interactions with methylphenidate and sulpiride versus placebo in all areas with high F-DOPA uptake signal.

We were open to the possibility that Ki in other regions predicted willingness to accept offers to perform high-cognitive effort tasks for money. However, the caudate nucleus has traditionally been regarded as “cognitive” (as opposed to “motor”) striatum and indeed fMRI  
800 work supports that cognitive motivation is encoded specifically in the caudate nucleus, while physical motivation was encoded more specifically in the putamen (40). Regarding the ventral striatum, fMRI work has shown that it encodes cognitive costs and benefits during effort-based decision-making (41). However, in rodent models, inactivations of the dorsal striatum reliably alter cognitive effort-based decision-making, while inactivations of the nucleus accumbens had  
805 inconclusive results (albeit due to global task performance effects; indeed, there were trending effects in the nucleus accumbens as well) (42). While our results do not implicate ventral striatal dopamine in promoting cognitive effort, they do not strictly rule out its involvement either.

*Reaction Times* Given the implication of striatal dopamine in vigor, we anticipated that dopamine synthesis capacity and drugs would also speed responding. Consistent with this  
810 prediction, mean response speed (inverse RT) increased on both methylphenidate and sulpiride versus placebo during both the discounting phase (Fig. S3A) and the subsequent gaze-decision task (Fig. S3B).

To ensure that this speeding was not merely a reflection of session order, or differences in characteristics of offers participants received in respective tasks, and to consider potential  
815 interactions with dopamine synthesis capacity, we regressed speed on multiple variables in fully-random hierarchical regression models. For the discounting task, we tested whether speed was predicted by session order, drug, caudate nucleus synthesis capacity, the interaction of drug and synthesis capacity, and the amount and load of the high-cost, high-benefit offer. We found that

820 participants responded faster on methylphenidate ( $\beta = 0.037$ ,  $P = 0.018$ ) and sulpiride at trend-  
level ( $\beta = 0.028$ ,  $P = 0.076$ ), and moreover that the effect of sulpiride on speeding was larger for  
those with lower caudate dopamine synthesis capacity (drug by synthesis capacity interaction:  $\beta$   
825 =  $-0.032$ ,  $P = 0.0054$ ). Additionally, participants responded faster when the base offer for the  
high-cost, high-benefit task was larger (€4 versus €2;  $\beta = 0.0088$ ,  $P = 6.2 \times 10^{-4}$ ) and in later  
sessions ( $\beta_{S2 \text{ vs } S1} = 0.073$ ,  $P = 1.2 \times 10^{-5}$ ;  $\beta_{S3 \text{ vs } S1} = 0.14$ ,  $P = 2.0 \times 10^{-8}$ ). Finally, there was a  
trend-level slowing when the load of the high-effort task increased ( $\beta = -0.0055$ ,  $P = 0.092$ ).  
There was neither a reliable main effect of dopamine synthesis capacity, nor an interaction  
between synthesis capacity and methylphenidate (both  $P$ 's  $\geq 0.41$ ).

In the subsequent gaze-decision task, we tested whether participants' speed was  
830 influenced by the difference in offer SV (high-cost / high-benefit SV minus low-cost / low-  
benefit SV), absolute value differences, drug, caudate synthesis capacity, session, and trial on  
response speed, and found that choice difficulty and dopamine affect mean response speed across  
sessions. Namely, participants responded faster on easier trials (larger absolute value differences:  
 $\beta = 0.017$ ,  $P = 4.5 \times 10^{-7}$ ), and on methylphenidate versus placebo ( $\beta = 0.031$ ,  $P = 0.038$ ). Other  
835 significant predictors included that participants responded faster on later trials ( $\beta = 0.030$ ,  $P =$   
 $2.9 \times 10^{-13}$ ), in later sessions ( $\beta_{S2 \text{ vs } S1} = 0.052$ ,  $P = 0.0023$ ;  $\beta_{S3 \text{ vs } S1} = 0.084$ ,  $P = 9.2 \times 10^{-5}$ ), and  
when the subjective value of the high-cost / high-benefit option increased relative to the  
subjective value of the low-cost / low-benefit option ( $\beta = 0.0084$ ,  $P = 0.0032$ ). There was neither  
a reliable main effect of dopamine synthesis capacity, nor reliable interactions between drug and  
dopamine synthesis capacity in the caudate nucleus (all  $P$ 's  $\geq 0.26$ ).

840 *Drug Effects on Self-Reported Affect and Medical Symptoms* Given that catecholamine  
drugs can impact subjective arousal, affect, and physiological symptoms, we were curious  
whether methylphenidate and sulpiride altered self-report measures and how these self-reported  
measures related to key results. We considered self-reported alertness, contentedness, calmness,  
PANAS positive and negative affect, and numerical ratings of various physiological symptoms  
845 including, (e.g. dizziness, headache, fatigue, etc.; collapsed to a single "medical" score). As  
noted, full details are provided in the on-line registration for the broader study at  
<https://www.trialregister.nl/trial/5959>.

We found no evidence that methylphenidate impacted subjective affect, arousal, or  
850 medical symptoms. None of the self-report measures were significantly different across drug  
sessions when measured just prior to (15 minutes before) the discounting task (all t-test  $P$ 's  $\geq$   
 $0.30$ ). Sulpiride, however, decreased negative affect ( $t(46) = -2.38$ ,  $P = 0.021$ ) and medical  
symptoms ( $t(46) = -2.06$ ,  $P = 0.045$ ) compared with placebo.

Next, we tested whether drug-induced changes in self-report measures predicted drug-  
855 induced changes in discounting behavior. Here we found no reliable individual difference  
correlations between methylphenidate-altered self-report measures and changes in AUC from the  
discounting task (all t-test  $P$ 's  $\geq 0.17$ ). However, sulpiride-induced increases in AUC correlated  
with decreases in negative affect (Spearman's  $\rho = -0.30$ ,  $P = 0.041$ ), increases in contentedness  
( $\rho = 0.44$ ,  $P = 0.0022$ ), and increases in alertness ( $\rho = 0.37$ ,  $P = 0.011$ ).

860 We next tested whether drug-induced changes alertness, contentedness, and negative  
affect might explain our putative effects of dopamine on subjective values. To test this, we fit  
hierarchical regression models identical to Eqn. 4 to test whether subjective values were  
predicted by methylphenidate and sulpiride versus placebo, caudate nucleus dopamine synthesis  
capacity ( $K_i$ ), and their interaction, but also included a single term for one of the self-report  
measures, and further allowed that term to vary by dopamine synthesis capacity. Thus, this test

865 allowed us to ask whether drugs and Ki altered subjective values, controlling for self-report  
measures. In all cases, whether controlling for drug-induced changes in alertness, contentedness,  
or negative affect, sulpiride reliably interacted with Ki (all  $P$ 's  $\leq 0.025$ ). Thus, although there  
was shared variance, sulpiride-induced changes in affect did not explain dopamine-dependent  
individual differences in the effects of sulpiride on subjective value.

870 We also conducted parallel analyses on data from the gaze-decision task to ask whether  
drug-induced changes in alertness, contentedness, and negative affect could account for drug  
effects on sensitivity to benefit or cost information. Indeed, sulpiride-induced changes in all three  
measures correlated with changes in sulpiride-induced high-effort selection rates. For alertness,  
the correlation was (Spearman's  $\rho = 0.29$ ,  $P = 0.047$ ), for contentedness it was ( $\rho = 0.45$ ,  $P =$   
875  $0.0019$ ), and for negative affect it was trending ( $\rho = -0.26$ ,  $P = 0.081$ ). No other sulpiride-  
altered subjective measures correlated with sulpiride-altered selection rates (all  $P$ 's  $\geq 0.25$ ).  
Likewise, there were no correlations between methylphenidate-altered subjective measures and  
methylphenidate-altered selection rates (all  $P$ 's  $\geq 0.20$ ).

880 To test whether self-reported alertness, contentedness, and negative affect explained the  
putative effects of dopamine on cost and benefit sensitivity, we fit hierarchical regression models  
identical to Eqn. 7, with the addition of a single main effect term for one self-report measure, and  
interactions between that self-report measure and benefits, costs, and Ki. These models thus  
allow us to test whether dopamine explains changes in benefit and cost sensitivity, controlling  
for changes in self-report measures. Across all our models, we found that sulpiride remained a  
885 significant (or trending in the case of alertness:  $P = 0.094$ , all other  $P$ 's  $\leq 0.028$ ) predictor of the  
effect of costs on choice. Thus, there was little evidence that drug-induced changes affect or  
mood explain drug effects on sensitivity to costs and benefits.

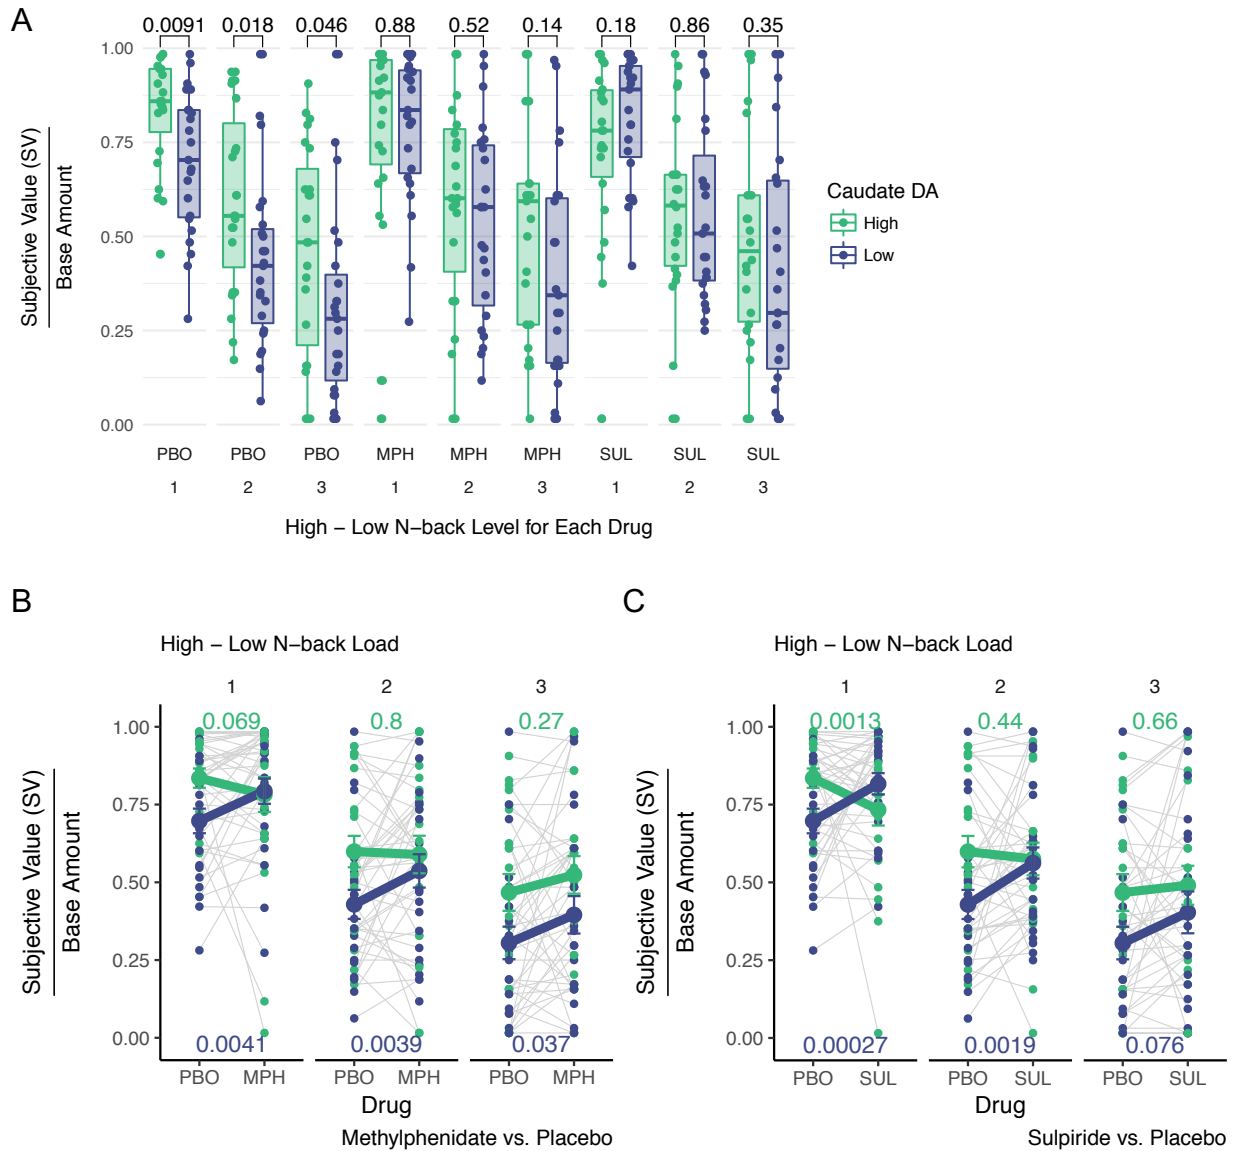

**Fig. S1.**

895 Subjective values for all participants as a function of drug, dopamine synthesis capacity in the caudate nucleus, and load differences between the high-effort and low-effort offers. **A.** Dopamine synthesis capacity separates participants' discounting at all N-back load difference levels. P-values provided for the group comparison at every load level. In particular, for placebo, the **B.** Methylphenidate reliably increases subjective values at all load levels for participants with low dopamine synthesis capacity, but has no reliable effects for high dopamine synthesis capacity participants. P-values report results of paired, within-subjects t-tests at every load level. **C.** Sulpiride also increases subjective values at all load levels (trending for the highest level) for low synthesis capacity participants. However, while sulpiride has no effect on high synthesis capacity participants at high load level differences, it also reliably decreases subjective values for the smallest load difference among participants with high dopamine synthesis capacity.

900



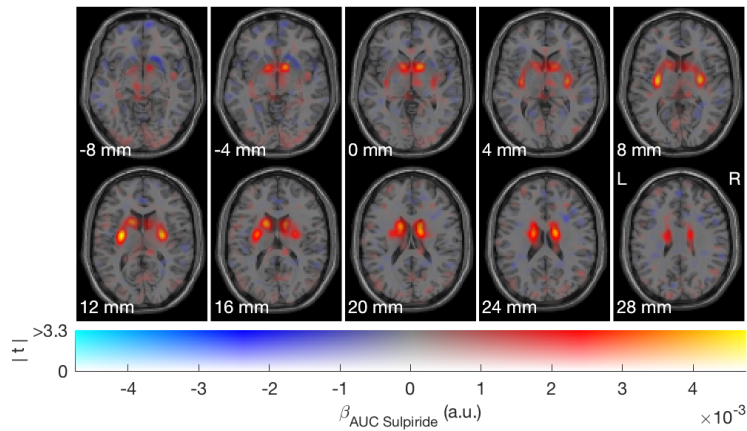

B

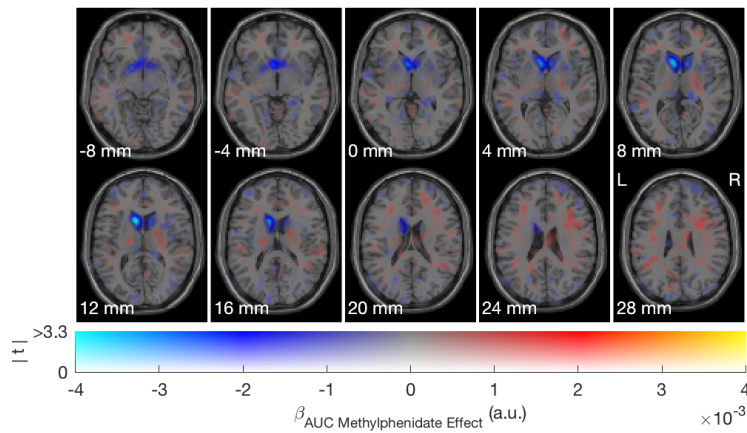

C

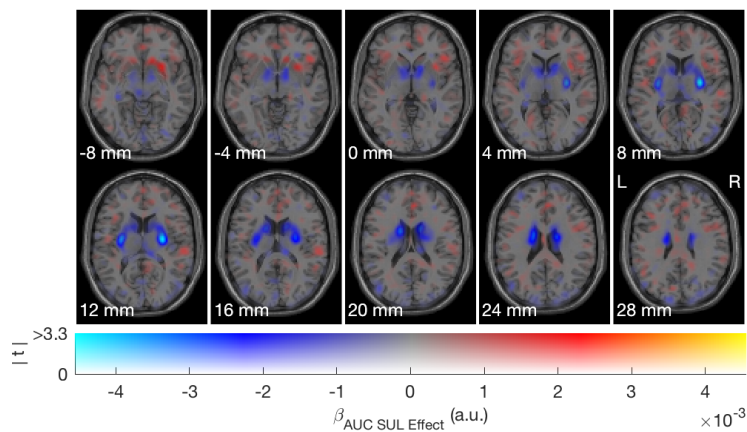**Fig. S2.**

Voxel-wise dual-display of dopamine synthesis capacity (Patlak Ki) values and their interactions with drugs predicting area under the discounting curve (AUC) across individuals. Color hue represents effect size and color opacity represents t-value. Warmer and more opaque colors indicate that higher dopamine synthesis capacity predicts shallower discounting under placebo (i.e., more willingness to expend effort for reward). Dual-display figure produced using the Slice Display code from: Zandbelt, Bram (2017): Slice Display. figshare.

10.6084/m9.figshare.4742866 **A.** On placebo, shading pattern indicates a concentration in the caudate nucleus and the posterior putamen predicting AUC – though only the caudate nucleus predicted AUC reliably in our core ROI analyses. **B.** Effect of methylphenidate on AUC varies by dopamine synthesis capacity, primarily in the caudate nucleus. Here, the negative sign reflects that methylphenidate mostly increases AUC for participants with low- versus high-dopamine synthesis capacity. **C.** Effect of sulpiride on AUC varies by dopamine synthesis capacity in the caudate nucleus and in the posterior putamen. However, as noted in the Supplemental Results, the results are reliable only in the caudate nucleus: there are no reliable interactions between sulpiride versus placebo and Ki in the putamen.

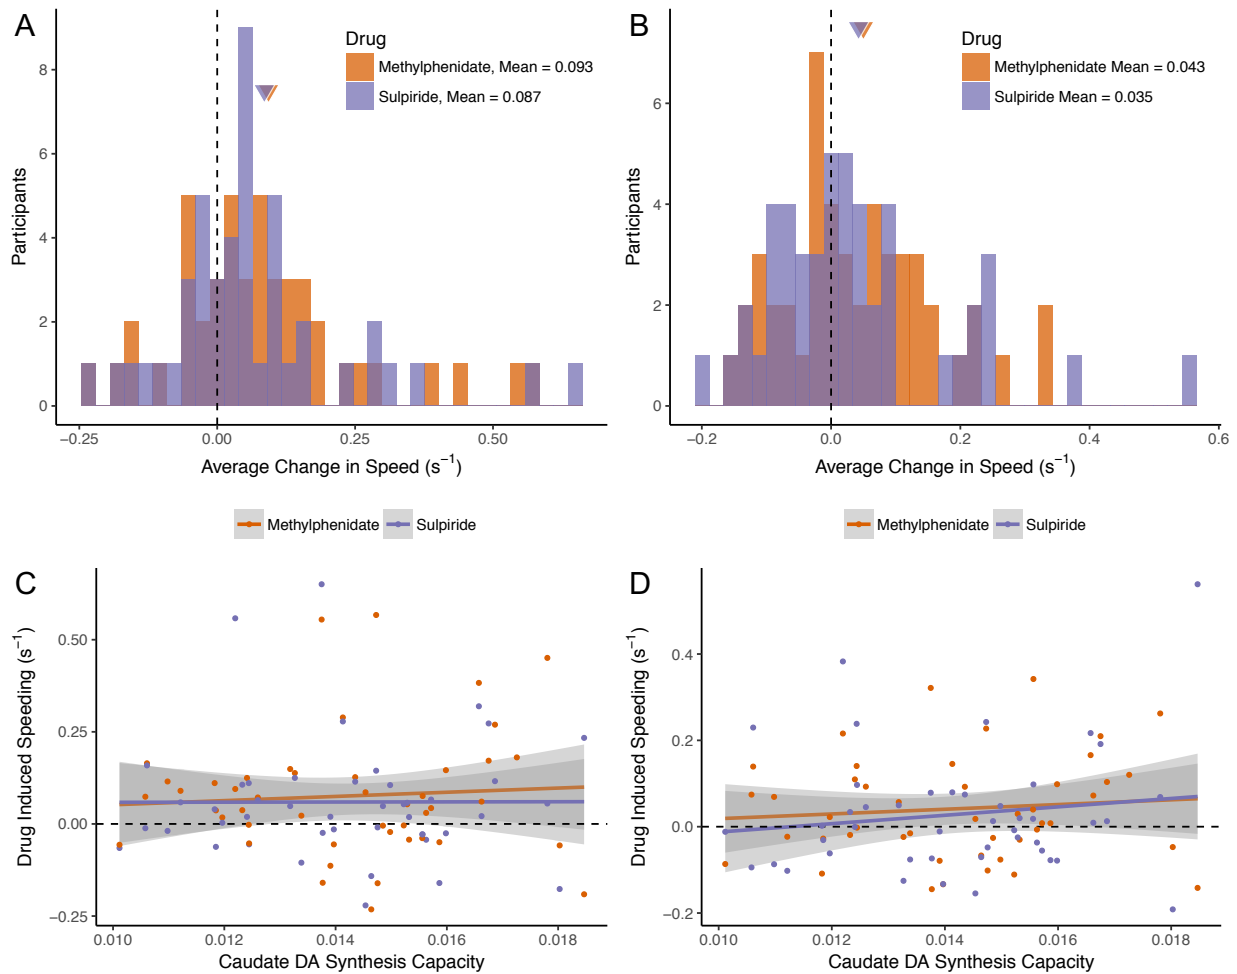

**Fig. S3.**

930 **A—B.** Drug-induced speeding as measured by inverse reaction time during the discounting task and the subsequent gaze-decision task. **C—D.** Drug induced speeding and its relationship to dopamine synthesis capacity in the caudate nucleus. **A)** During the discounting task, participants were faster on methylphenidate ( $P = 0.0022$ ) and sulpiride ( $P = 0.0089$ ) versus placebo, as revealed by paired t-tests of mean, inverse reaction time. **B)** During the gaze-decision task, participants were faster on methylphenidate ( $P = 0.014$ ) and sulpiride at trend-level ( $P = 0.095$ ).  
 935 **C)** In the discounting task, there was no reliable relationship between dopamine synthesis capacity and drug-induced speeding for either drug in according to linear regression models (both  $P$ 's  $\geq 0.64$ ). **D)** In the gaze-decision task, there was no reliable relationship between dopamine synthesis capacity and drug-induced speeding for either drug in according to linear regression models (both  $P$ 's  $\geq 0.64$ ).

**Table S1.**

| Predictor        | Estimate | Standard Error | P-value               |
|------------------|----------|----------------|-----------------------|
| Intercept        | 0.57     | 0.031          | $2.2 \times 10^{-16}$ |
| Offer Amount     | 0.018    | 0.0056         | 0.0020                |
| MPH vs. PBO      | 0.024    | 0.023          | 0.30                  |
| SUL vs. PBO      | 0.013    | 0.035          | 0.70                  |
| Caudate DA       | 0.068    | 0.024          | 0.0072                |
| Load Difference  | -0.14    | 0.012          | $2.9 \times 10^{-15}$ |
| MPH * Caudate DA | -0.067   | 0.022          | 0.0042                |
| SUL * Caudate DA | -0.10    | 0.028          | $8.3 \times 10^{-4}$  |
| Session 2 vs. 1  | 0.0097   | 0.025          | 0.70                  |
| Session 3 vs. 1  | 0.076    | 0.043          | 0.083                 |

Table of fitted parameters of model testing effects of offer amount, drug (MPH: methylphenidate, PBO: placebo, SUL: sulpiride), dopamine synthesis capacity and relative load difference on the subjective value of high-effort offers in the discounting phase (from Eqn. 4).

**Table S2.**

| Predictor                     | Estimate | Standard Error | P-value               |
|-------------------------------|----------|----------------|-----------------------|
| Intercept                     | 1.17     | 0.44           | 0.0070                |
| Costs ( $\Delta$ load levels) | -1.07    | 0.10           | $2.2 \times 10^{-16}$ |
| Benefits ( $\Delta$ amounts)  | 2.30     | 0.38           | $1.2 \times 10^{-9}$  |
| MPH vs. PBO                   | 1.75     | 0.56           | 0.0016                |
| SUL vs. PBO                   | 0.46     | 0.30           | 0.12                  |
| Caudate DA                    | 1.02     | 0.28           | $3.1 \times 10^{-4}$  |
| Costs * MPH                   | 0.030    | 0.11           | 0.78                  |
| Costs * SUL                   | 0.24     | 0.11           | 0.036                 |
| Costs * Caudate DA            | 0.044    | 0.062          | 0.48                  |
| Benefits * MPH                | 1.34     | 0.48           | 0.0048                |
| Benefits * SUL                | 0.091    | 0.29           | 0.75                  |
| Benefits * Caudate DA         | 0.65     | 0.21           | 0.0024                |
| Session 2 vs. 1               | 0.26     | 0.17           | 0.12                  |
| Session 3 vs. 1               | 0.57     | 0.22           | 0.011                 |

945 Table of fitted parameters of model testing effects of relative costs, benefits, drugs, dopamine synthesis capacity, and relevant interactions on (logistic) selection of the high-cost, high-benefit option in the gaze-decision task (from Eqn. 7).

**Table S3.**

| Predictor                 | Estimate | Standard Error | P-value               |
|---------------------------|----------|----------------|-----------------------|
| Intercept                 | 0.52     | 0.14           | $2.8 \times 10^{-4}$  |
| Hi – Lo Offer SV          | 1.44     | 0.11           | $2.2 \times 10^{-16}$ |
| Summed SV                 | -0.0041  | 0.12           | 0.98                  |
| Proportion Hi Gaze        | 0.83     | 0.057          | $2.2 \times 10^{-16}$ |
| Summed SV * Prop. Hi Gaze | 0.090    | 0.032          | 0.0048                |
| Session 2 vs. 1           | 0.64     | 0.22           | 0.0036                |
| Session 3 vs. 1           | 0.32     | 0.20           | 0.12                  |

950 Table of fitted parameters of model testing effects of offer subjective value (SV) differences, summed SV, proportion gaze at the high-effort offer (Hi), and their interaction, as well as session number on (logistic) selection of the high-cost, high-benefit option in the gaze-decision task (from Eqn. 9).

**Table S4.**

| Predictor                          | Estimate | Standard Error | P-value |
|------------------------------------|----------|----------------|---------|
| Intercept                          | -0.15    | 0.11           | 0.18    |
| Choice type (high- vs. low-effort) | 0.42     | 0.13           | 0.0017  |
| Caudate DA                         | -0.028   | 0.11           | 0.79    |
| MPH vs. PBO                        | -0.20    | 0.12           | 0.10    |
| SUL vs. PBO                        | -0.12    | 0.13           | 0.34    |
| Choice * Caudate DA                | 0.37     | 0.13           | 0.0045  |
| Choice * MPH                       | 0.090    | 0.14           | 0.53    |
| Choice * SUL                       | 0.25     | 0.14           | 0.083   |
| MPH * Caudate DA                   | 0.22     | 0.12           | 0.070   |
| SUL * Caudate DA                   | 0.10     | 0.13           | 0.44    |
| Choice * MPH * Caudate DA          | -0.36    | 0.14           | 0.012   |
| Choice * SUL * Caudate DA          | -0.041   | 0.15           | 0.78    |

955 Table of fitted parameters of model testing effects of choice type (whether the participant selected the high- versus low-effort offer), caudate dopamine (DA) synthesis capacity, drug and their interactions on average proportion fixation of benefits versus cost information, across all time points 250—450 ms following offer onset in the gaze-decision task (from Eqn. 10).

**Table S5.**

| Model                                   | Equation | All            | PBO            | MPH            | SUL            |
|-----------------------------------------|----------|----------------|----------------|----------------|----------------|
| Additive Net Value                      | S11      | 81824<br>(228) | 26822<br>(212) | 23981<br>(212) | 26060<br>(207) |
| Multiplicative Net Value                | S12      | 82122<br>(229) | 26925<br>(211) | 24197<br>(212) | 26105<br>(215) |
| Additive Attributes                     | S13      | 79465<br>(301) | 25728<br>(275) | 22471<br>(262) | 24798<br>(244) |
| Multiplicative Attributes               | S14      | 80321<br>(287) | 26124<br>(250) | 22847<br>(252) | 25068<br>(244) |
| Additive &<br>Multiplicative Net Value  | S15      | 81774<br>(262) | 26814<br>(234) | 23978<br>(236) | 26034<br>(235) |
| Additive &<br>Multiplicative Attributes | 1        | 78786<br>(364) | 25577<br>(317) | 22375<br>(309) | 24657<br>(283) |

960 Table of DIC values (effective number of parameters  $p_D$  is given in parentheses) for each model tested in HDDM using either all the data (ALL), or data from each of the individual drug sessions: placebo (PBO), methylphenidate (MPH), and sulpiride (SUL). Key model features include whether gaze and value combine additively or multiplicatively, and whether alternative offer values, or attribute values drive evidence accumulation.



**Table S6.**

| Pre-bifurcation Model                   | Equation | All            | PBO            | MPH            | SUL            |
|-----------------------------------------|----------|----------------|----------------|----------------|----------------|
| Additive Attributes                     | S13      | 73598<br>(299) | 23684<br>(271) | 20615<br>(252) | 22703<br>(266) |
| Multiplicative Attributes               | S14      | 73136<br>(300) | 23568<br>(265) | 20552<br>(261) | 22710<br>(256) |
| Additive &<br>Multiplicative Attributes | 1        | 72846<br>(370) | 23437<br>(331) | 20459<br>(308) | 22575<br>(310) |
| Post-bifurcation Model                  | Equation | All            | PBO            | MPH            | SUL            |
| Additive Attributes                     | S13      | 72811<br>(292) | 23492<br>(265) | 20369<br>(249) | 22561<br>(231) |
| Multiplicative Attributes               | S14      | 73892<br>(309) | 23874<br>(269) | 20768<br>(271) | 22950<br>(268) |
| Additive &<br>Multiplicative Attributes | 1        | 72804<br>(373) | 23564<br>(323) | 20383<br>(312) | 22594<br>(294) |

965 Table of DIC values (effective number of parameters  $p_D$  is given in parentheses) for each model fit using HDDM and either pre- or post-bifurcation gaze data from either all sessions (ALL), or data from each of the individual drug sessions: placebo (PBO), methylphenidate (MPH), and sulpiride (SUL).
